# Western diet-induced shifts in the maternal microbiome are associated with altered microRNA expression in baboon placenta and fetal liver

1        **Kameron Y. Sugino<sup>1,†</sup>, Ashok Mandala<sup>1,†</sup>, Rachel C. Janssen<sup>1</sup>, Sunam Gurung<sup>2</sup>, MaJoi**  
2        **Trammell<sup>3</sup>, Michael W. Day<sup>3</sup>, Richard S. Brush<sup>4</sup>, James F. Papin<sup>5</sup>, David W. Dyer<sup>3</sup>, Martin-**  
3        **Paul Agbaga<sup>4,6</sup>, Jacob E. Friedman<sup>1,7</sup>, Marisol Castillo-Castrejon<sup>5,8</sup>, Karen R. Jonscher<sup>1,9,\*</sup> and**  
4        **Dean A. Myers<sup>2</sup>**

5        <sup>1</sup> Harold Hamm Diabetes Center, University of Oklahoma Health Sciences Center, Oklahoma City,  
6        OK, USA

7        <sup>2</sup> Department of Obstetrics and Gynecology, University of Oklahoma Health Sciences Center,  
8        Oklahoma City, OK, USA

9        <sup>3</sup> Department of Microbiology and Immunology, University of Oklahoma Health Sciences Center,  
10        Oklahoma City, OK, USA

11        <sup>4</sup> Department of Ophthalmology, University of Oklahoma Health Sciences Center, Oklahoma City,  
12        OK, USA

13        <sup>5</sup> Department of Pathology, University of Oklahoma Health Sciences Center, Oklahoma City, OK,  
14        USA

15        <sup>6</sup> Department of Cell Biology, University of Oklahoma Health Sciences Center, Oklahoma City, OK,  
16        USA

17        <sup>7</sup> Department of Physiology, University of Oklahoma Health Sciences Center, Oklahoma City, OK,  
18        USA

19        <sup>8</sup> Stephenson Cancer Center, University of Oklahoma Health Sciences Center, Oklahoma City, OK,  
20        USA

21        <sup>9</sup> Department of Biochemistry and Molecular Biology, University of Oklahoma Health Sciences  
22        Center, Oklahoma City, OK, USA

23        <sup>†</sup>These authors contributed equally to this work and share first authorship.

24        \* **Correspondence:**

25        Karen R. Jonscher

26        karen-jonscher@ouhsc.edu

27        **Keywords: NAFLD, epigenetic programming, nonhuman primate, inflammation, fetal**  
28        **programming**

29        5916 words

30        5 figures, 5 tables

## 31 Abstract

32 Maternal consumption of a high-fat, Western-style diet (WD) disrupts the maternal/infant  
33 microbiome and contributes to developmental programming of the immune system and nonalcoholic  
34 fatty liver disease (NAFLD) in the offspring. Epigenetic changes, including non-coding miRNAs in  
35 the fetus and/or placenta may also underlie this risk. We previously showed that obese nonhuman  
36 primates (NHP) fed a WD during pregnancy results in the loss of beneficial maternal gut microbes  
37 and dysregulation of cellular metabolism and mitochondrial dysfunction in the fetal liver, leading to a  
38 perturbed postnatal immune response with accelerated NAFLD in juvenile offspring. Here, we  
39 investigated associations between WD-induced maternal metabolic and microbiome changes, in the  
40 absence of obesity, and miRNA and gene expression changes in the placenta and fetal liver. After ~8-  
41 11 months of maternal WD feeding (mWD), dams were similar in body weight but exhibited mild,  
42 systemic inflammation (elevated CRP and neutrophil count) and dyslipidemia (increased  
43 triglycerides and cholesterol) compared with dams fed a control diet. The maternal gut microbiome  
44 was mainly comprised of *Lactobacillales* and *Clostridiales*, with significantly decreased alpha  
45 diversity ( $P = 0.0163$ ) in WD-fed dams but no community-wide differences ( $P = 0.26$ ). At 0.9  
46 gestation, mRNA expression of *IL6* and *TNF* in mWD-exposed placentas trended higher, while  
47 increased triglycerides, expression of pro-inflammatory *CCR2*, and histological evidence for fibrosis  
48 were found in mWD-exposed fetal livers. In the mWD-exposed fetus, hepatic expression levels of  
49 miR-204-5p and miR-145-3p were significantly downregulated, whereas in mWD-exposed placentas,  
50 miR-182-5p and miR-183-5p were significantly decreased. Notably, miR-1285-3p expression in the  
51 liver and miR-183-5p in the placenta were significantly associated with inflammation and lipid  
52 synthesis pathway genes, respectively. *Blautia* and *Ruminococcus* were significantly associated with  
53 miR-122-5p in liver, while *Coriobacteriaceae* and *Prevotellaceae* were strongly associated with miR-  
54 1285-3p in the placenta; both miRNAs are implicated in pathways mediating postnatal growth and  
55 obesity. Our findings demonstrate that mWD shifts the maternal microbiome, lipid metabolism, and  
56 inflammation prior to obesity and are associated with epigenetic changes in the placenta and fetal  
57 liver. These changes may underlie inflammation, oxidative stress, and fibrosis patterns that drive  
58 NAFLD and metabolic disease risk in the next generation.

59

## 60 Introduction

61 Nonalcoholic fatty liver disease (NAFLD) is the most common liver disease worldwide.  
62 Characterized by simple steatosis (excess liver fat), NAFLD may progress to nonalcoholic  
63 steatohepatitis (NASH) with inflammation and fibrosis, leading to cirrhosis and increased risk for  
64 hepatocellular carcinoma (1). The CDC estimates that >18 million women of reproductive age in the  
65 U.S. are obese, and maternal obesity is strongly linked to inflammatory and metabolic disorders in  
66 the offspring (2-7). Alarmingly, 1 in 5 preschoolers are obese (8) and 1/3 of obese youth are  
67 diagnosed with NAFLD (9). Despite evidence that maternal overnutrition adversely influences  
68 metabolic health in human (10) and animal (11-15) offspring, there is a fundamental lack of insight  
69 into molecular mechanisms by which maternal dietary exposures reprograms fetal immune  
70 development and NAFLD in utero, particularly in models that reflect the human condition.

71 The placenta acts as the primary interface between mother and fetus, allowing nutrient and  
72 oxygen transfer which supports fetal growth and development. Obesity-associated maternal-fetal  
73 inflammation contribute to various adverse pregnancy outcomes including placental dysfunction (16,  
74 17), preeclampsia, neurodevelopment (18), intrauterine growth restriction (19, 20), and preterm labor  
75 (21, 22). An investigation of the chronic pro-inflammatory milieu in placentas from obese  
76 pregnancies showed a two- to three-fold increase in resident macrophages (CD68+ and CD14+) and  
77 expression of pro-inflammatory cytokines compared with placentas from lean pregnancies (23).  
78 However, the underlying causes of placental inflammation remain unclear. One possible mechanism  
79 is through inflammatory metabolites, such as lipopolysaccharides, which are produced by the  
80 microbiome, reach higher systemic levels in obesity (24), and can directly interact with placental  
81 Toll-like receptor 4 (25). The role of a Western-style diet (WD) versus maternal obesity in disruption  
82 of placental function and inflammatory state remains to be elucidated, as most animal models of  
83 maternal obesity have relied upon a WD to attain and maintain obesity.

84 The maternal gut microbiome changes during pregnancy and is influenced by maternal diet,  
85 maternal obesity, excessive gestational weight gain, and gestational diabetes mellitus (GDM) (26-  
86 28). Animal and human studies (29-32) support a role for the maternal gut microbiome and bacterial  
87 metabolites in the pathophysiological changes accompanying maternal obesity (33), offspring  
88 NAFLD (34, 35), and infant inflammatory disorders (36). WD-induced maternal obesity is associated  
89 with impaired microbiome and placental structural and functional changes, concomitant with  
90 oxidative stress and inflammation in the intrauterine environment (37-39). Trophoblasts recognize  
91 and respond to bacterial products (40) and integrate microbial-derived signals via pathways  
92 mediating the response to Toll-like receptors or epigenetic modifications (41). Although mechanisms  
93 by which products of gut dysbiosis affect placental inflammation/function and fetal inflammation are  
94 not well understood, reduction in beneficial bacterial metabolites might play a role.

95 Emerging studies are addressing the association of maternal diet and obesity with alterations to  
96 epigenetic signatures and microbiome function in offspring (13, 42). The epigenome consists of  
97 DNA and histone modifications that produce heritable changes in transcription and cellular function  
98 (43). One form of epigenetic modification are microRNAs (miRNAs). MiRNAs are small, noncoding  
99 RNAs that bind to the 3' untranslated region of protein-coding mRNAs, degrading or repressing  
100 translation of the targeted mRNAs. In humans, miR-122, miR-34a, miR-21, and miR-29a were  
101 shown to regulate lipid metabolism, oxidative stress, and inflammation in the liver, with a crucial role  
102 in the pathophysiology of NAFLD (44-47). Studies investigating the impact of early changes in  
103 miRNAs in the fetal liver are sparse; however, using large-scale sequencing and pathway analysis in  
104 baboon fetal liver, Puppala et al. identified 11 miRNAs targeting 13 genes in metabolic pathways  
105 (TCA cycle, oxidative phosphorylation, and glycolysis), the proteasome and WNT/ $\beta$ -catenin

106 signaling (48). In the placenta, miRNA expression levels are disrupted by hypoxia (49), maternal  
107 exposure to toxic agents such as cigarette smoke (50) and bisphenol A (51), and GDM (52). In  
108 humans, elevated pre-pregnancy BMI has been associated with lower expression levels of placental  
109 miRNAs; these differences were modified by offspring sex and maternal gestational weight gain  
110 (53). However, studies investigating associations between maternal diet, SCFAs, and epigenetic  
111 modifications in the placenta and fetal liver are lacking. Here, we leveraged our well-established  
112 Olive baboon (*Papio anubis*) nonhuman primate (NHP) model of maternal WD consumption to  
113 investigate changes in the maternal microbiome and their association with placental and fetal liver  
114 miRNA expression profiles in non-obese pregnancy.

## 115 **Materials and Methods**

### 116 **Animal model**

117 All experiments utilizing baboons were performed in compliance with guidelines established by the  
118 Animal Welfare Act for housing and care of laboratory animals as well as the U.S. National Institutes  
119 of Health Office of Laboratory Animal Welfare Public Health Service Policy on Humane Care and  
120 Use of Laboratory Animals. All animals received environmental enrichment. All experiments were  
121 conducted in accordance with and with approval from the University of Oklahoma Health Sciences  
122 Center Institutional Animal Care and Use Committee (IACUC; protocol 302043 #22-025-AH).

123 Nulliparous Olive baboon females (*Papio anubis*; n=11; 4-7 years old; puberty is ~4-5 years  
124 of age) with similar lean body scores were randomly separated into two primary cohorts with similar  
125 mean age and body weight, taking into consideration social stratification. Dams were housed in diet  
126 groups (n=5/6 per corral) for the duration of the study. Control diet (CD) dams were fed standard  
127 monkey chow diet (5045, Purina LabDiets, St. Louis, MO; 30.3% calories from protein, 13.2% from  
128 fat, 56.5% from carbohydrates) and the WD dams were fed a high-fat, high-simple sugar diet (TAD  
129 Primate diet, 5L0P, Purina; 18.3% calories from protein, 36.3% of calories from fat, 45.4% from  
130 carbohydrates), matched to CD for micronutrients and vitamins, and supplemented with continuous  
131 access to a high-fructose beverage (100 g/L KoolAid™). Both groups were provided the same daily  
132 enrichment foods (fruits and peanuts). The TAD diet/high-fructose drink is widely used to study the  
133 role of an excess energy intake, high-saturated fat, high-fructose diet on physiological systems in  
134 NHPs (54, 55) and is consistent with human WDs. After an initial 3 months of WD to allow for  
135 collection of baseline samples and acclimation to WD, dams were bred to males that had been  
136 previously fed CD. Blood, fecal samples, and anthropometric measurements (body weight and sum  
137 of skin folds) were obtained under ketamine (10-20 mg/kg) and acepromazine (0.05-0.5 mg/kg)  
138 sedation administered via intramuscular injection. Following chemical sedation, cephalic or  
139 saphenous vein catheters were placed for blood draw. At 0.6 gestation (G; term is ~183 days  
140 gestation) baboons were fasted overnight. Intravenous glucose tolerance test (IVGTT) was performed  
141 under ketamine and acepromazine sedation and two appropriately sized intravenous catheters were  
142 placed into each saphenous or cephalic vein, or a combination thereof, one for infusion of dextrose  
143 and one for venous blood collection. A baseline blood draw was taken from one catheter and an  
144 intravenous bolus of 50% dextrose (0.5 g/kg body weight) was administered over 30 seconds through  
145 the second catheter. Blood glucose was measured in venous blood using a glucometer at time 0, 2, 4,  
146 8, 12, 16, 20, and 40 min post dextrose infusion.

### 147 **Maternal blood analyses**

148 Complete blood counts (CBCs) were obtained for the dams from EDTA-anticoagulated whole blood  
149 samples. CBCs included analyses for red blood cells, white blood cell count (neutrophils,  
150 lymphocytes, monocytes, eosinophils and basophils), platelets, and hemoglobin. Maternal serum

151 samples collected at 0.6 G were analyzed for C-reactive protein (CRP) using an hsCRP ELISA kit  
152 (MP Biomedicals, Solon, OH) according to the manufacturer's protocol with 1:100 serum dilution  
153 and were analyzed for IL-6 using an old world monkey IL-6 ELISA kit (U-CyTech Biosciences, the  
154 Netherlands) according to the manufacturer's protocol. Maternal serum samples were analyzed for  
155 triglycerides (TGs) using a triglyceride colorimetric assay kit (Cayman Chemical, Ann Arbor, MI)  
156 according to the manufacturer's protocol. High-density lipoprotein (HDL) and low-density  
157 lipoprotein/very low-density lipoprotein (LDL/VLDL) levels were quantified in serum samples taken  
158 at 0.6 G from fasted dams using EnzyChrom HDL and LDL/VLDL Assay Kits (BioAssay Systems,  
159 Hayward, CA). Samples were assayed in duplicate according to the manufacturer's instructions.

## 160 **Cesarean section**

161 At 0.9 G, dams were anesthetized using isoflurane and fetuses were delivered by cesarean section.  
162 Fetal and placental weights were obtained, and placental and liver tissue samples were processed for  
163 histology or flash-frozen in liquid nitrogen and stored at -80°C for subsequent analyses.

## 164 **Liver histology**

165 Fetal liver tissue samples from the left lobe were fixed in 10% formalin for 24 h followed by storage  
166 in 70% EtOH. Histology was performed by the OUHSC Stephenson Cancer Tissue Pathology Core.  
167 In brief, samples were paraffin-embedded and sectioned for H&E and picosirius red staining. Fresh-  
168 frozen liver from the left lobe was fixed in OCT compound, sectioned, and fixed with formalin for 5  
169 min and washed with PBS. LipidSpot lipid droplet stain (Biotium, Fremont, CA) was added to the  
170 sections and incubated for 20 min. Sections were washed with PBS, counterstained with DAPI, and  
171 mounted using VectaMount AQ aqueous mounting medium (Vector Labs, Burlingame, CA). Slides  
172 were visualized using a Cytation 5 microscope and Gen5 imaging software (Agilent, Santa Clara,  
173 CA).

## 174 **Placenta immunofluorescence**

175 Immediately upon delivery of the placenta during cesarean section, placental tissue was dissected  
176 from each cotyledon: one half of each sample was flash-frozen and stored at -80°C and the other half  
177 was fixed in 4% paraformaldehyde for 48 h, transferred to 70% EtOH, and paraffin embedded. Thin  
178 sections (5-micron thickness) were obtained every 150 microns from the paraffin blocks and placed  
179 onto slides. For immunofluorescence (IF) labelling, sections were selected to allow for a total of four  
180 sections per cotyledon at a minimum of 150 microns between sections. Slides were baked for 1 h at  
181 56°C, deparaffinized and antigen retrieval was performed in a Retriever 2100 instrument with R-  
182 Universal epitope recovery buffer (Electron Microscopy Sciences, Hatfield, PA). After retrieval,  
183 slides were blocked in 5% normal donkey serum for 1 h, then primary antibody (MAC387 [anti-  
184 S100A9 + Calprotectin], Abcam, Cambridge, UK) was added and slides were incubated for 16 h at  
185 4°C with humidification. Slides were subsequently allowed to equilibrate to RT for 1 h. Secondary  
186 antibody (donkey anti-mouse IgG F(ab')<sub>2</sub> Alexa Fluor 594, Jackson ImmunoResearch, West Grove,  
187 PA) was added and slides were incubated for 1 h, covered, at RT. Slides were counterstained for 5  
188 min with DAPI and coverslipped using Shur/Mount. Slides were visualized using a fluorescence  
189 microscope (Olympus BX43) and images were captured using CellSens imaging software  
190 (Olympus). Four 150x150 micron images were selected randomly per tissue section (700x500  
191 microns) with no overlap between selected sections and macrophages were counted by a researcher  
192 blinded to the treatment group. Total macrophages were summed for all images per placenta and  
193 scored.

## 194 **Fetal liver and placental tissue analyses**

195 RNA was extracted from flash-frozen fetal liver (left lobe) samples using a Direct-zol RNA miniprep  
196 kit (Zymo Research, Irvine, CA) per manufacturer instructions. cDNA was synthesized from 1  $\mu$ g  
197 RNA using iScript Supermix (Bio-Rad, Hercules, CA) per manufacturer instructions. Gene  
198 expression was measured using real time qPCR with PowerUp SYBR Green Master mix on a  
199 QuantStudio 6 instrument (Thermo Fisher Scientific, Waltham, MA). Results were normalized to  
200 *RPS9* (ribosomal protein S9) using the comparative Ct method. For placenta, qPCR was performed  
201 similar to fetal liver except using a CFX96 RT-PCR Detection System (Bio-Rad, Hercules, CA).  
202 Placental results were normalized to *ACTB* using the comparative Ct method. Primers for qPCR are  
203 shown in **Supplementary Table S1**. Fetal liver TGs were extracted as described previously (32) and  
204 quantified using Infinity Triglycerides Reagent (Thermo Fisher) with normalization to starting tissue  
205 weight.

206 Total RNA, including miRNA, was isolated from flash-frozen fetal liver (left lobe) and  
207 placenta tissues (two samples/placenta from separate cotyledons) using miRNeasy mini kit (Qiagen,  
208 Germantown, MD) following manufacturer's instructions. TaqMan MicroRNA Assays (Thermo  
209 Fisher) were used for reverse transcription and real-time qPCR (miR-122-5p, assay ID 002245; miR-  
210 204-5p, assay ID 000508; miR-34a-5p, assay ID 000426; miR-21-5p, assay ID 000397; miR-183-5p,  
211 assay ID 000484; miR-29a-3p, assay ID 002112; miR-185-5p, assay ID 002271; miR-145-3p, assay  
212 ID 002149; miR-1285-3p, assay ID 002822; miR-199a-5p, assay ID 000498; miR-182-5p, assay ID  
213 000597). Reverse transcription was carried out using TaqMan MicroRNA Reverse Transcription kit  
214 (Thermo Fisher), an RT primer from a specific TaqMan MicroRNA Assay, and 10 ng total RNA  
215 following manufacturer's instructions. The miRNA-specific cDNA templates were placed on ice and  
216 used immediately for qPCR or stored at  $-20^{\circ}\text{C}$  for 1-2 days prior to use. Real-time PCR reactions  
217 were performed in duplicate using TaqMan Universal Master Mix II, no UNG (Thermo Fisher) and  
218 the corresponding TaqMan MicroRNA Assay following manufacturer's instructions. Assays were  
219 performed on a QuantStudio 6 Real-time PCR System. Ct values were calculated and the relative  
220 miRNA expression levels were quantitated with the comparative Ct method and using miR-92a-3p  
221 (assay ID 000431) for normalization.

## 222 SCFA analysis

223 Frozen feces (100-200 mg) were added to a vial containing 200  $\mu$ g/L of deuterated butyric acid  
224 (internal standard), 0.2 g/ml  $\text{NaH}_2\text{PO}_4$ , and 0.8 g/ml ammonium sulfate (adjusted to pH 2.5 with  
225 phosphoric acid). External standards were prepared with 0.2 g/ml  $\text{NaH}_2\text{PO}_4$ , 0.8 g/ml ammonium  
226 sulfate, 200  $\mu$ g/L deuterated butyric acid (internal standard), 200  $\mu$ g/L 2:0 (acetic acid), 100  $\mu$ g/L 3:0,  
227 and 50  $\mu$ g/L of 4:0, 5:0, and 6:0 (adjusted to pH 2.5). All vials were quickly capped and vigorously  
228 agitated. A 7890A gas chromatograph equipped with 7697A headspace sampler, 5975C mass  
229 spectrometer detector, and DB-FATWAX UI 30 x 0.25 x 250 column was used for analysis  
230 (Agilent). The headspace sampler oven, loop, and transfer line temperatures were held at  $50^{\circ}\text{C}$ ,  
231  $100^{\circ}\text{C}$ , and  $110^{\circ}\text{C}$ , respectively. The vial equilibration time was 30 min and the injection duration  
232 was 1 min. The vial fill pressure was 15 psi and the loop final pressure was 1.5 psi. Loop  
233 equilibration time was 0.05 min. The GC inlet and MS interface were held at  $250^{\circ}\text{C}$ . The oven  
234 temperature was held at  $120^{\circ}\text{C}$  for 2 min, ramped at  $5^{\circ}\text{C}/\text{min}$  to  $140^{\circ}\text{C}$ , ramped at  $20^{\circ}\text{C}/\text{min}$  to  
235  $220^{\circ}\text{C}$ , and held at  $220^{\circ}\text{C}$  for 1 min. Helium carrier gas flowed constantly at 1.2 ml/min and the split  
236 ratio was 10:1. SCFAs were detected in SIM ion mode using  $m/z$  values of 43, 45, 60, 63, 73, 74, 77,  
237 and 87. Quantities of 2:0, 3:0, 4:0, 5:0, and 6:0 were determined by comparison to external standards.

## 238 Microbial DNA extraction and sequencing

239 DNA extraction from feces from dams employed the DNeasy PowerSoil Pro Kit (Qiagen) per  
240 manufacturer's instructions with the following modification. Aliquots of 300 mg of fecal material

241 were weighed, resuspended in 800  $\mu$ L Solution CD1, and incubated at 60°C for 10 min. Library  
242 construction and DNA sequencing were performed by the OUHSC Laboratory for Molecular Biology  
243 and Cytometry Research. Library construction employed the Nextera XT Library Preparation Kit  
244 (Illumina, San Diego, CA). Samples were barcoded for multiplexing, and sequenced on an Illumina  
245 MiSeq using paired-end sequencing with a 600 cycle MiSeq Reagent Kit v3 (Illumina).

## 246 **Data Analysis**

247 Maternal data, fetal liver TGs, and qPCR data were analyzed for comparisons between CD and WD  
248 using an unpaired, 2-tailed Student's *t* test; significance was determined as  $P < 0.05$ . Initial  
249 processing of raw microbiome data employed QIIME2 2019.10 software (56). Sequenced 16S rRNA  
250 raw fastq files were imported as demultiplexed paired end reads with a Phred score of 33. Sequences  
251 were trimmed, quality filtered and denoised into amplicon sequence variants (ASVs) using DADA2  
252 (57). ASVs were then aligned de novo using MAFFT (58) and structured into a rooted phylogenetic  
253 tree using FastTree2 (59). Alpha diversity (e.g., Faith's Phylogenetic Diversity, Shannon) and beta  
254 diversity (e.g., Weighted UniFrac distance, Bray-Curtis) were compared between diet groups using  
255 Kruskal-Wallis and PERMANOVA, respectively. Taxonomy was assigned to each ASV using a  
256 sklearn-based Naïve Bayes taxonomy classifier (60) pre-trained on the Greengenes 13\_8 99% OTUs  
257 reference database sequences (61). Linear discriminant analysis effect size, LefSe (62), assessed the  
258 raw taxonomic abundance table for significant taxa which are differentially abundant in the context  
259 of the experimental groups.

260 Variable selection methods: Due to the small sample size ( $n = 11$ ) and relatively large number  
261 of comparison variables for mother (11 measures) and fetus (63 measures), we performed Least  
262 Absolute Shrinkage and Selection Operator (LASSO) regularization (63) to utilize the technique's  
263 variable selection properties before testing for significance between maternal and fetal  
264 measurements. Briefly, LASSO regression applies a shrinkage term ( $\lambda$ ) to coefficients in the  
265 model in order to improve (i.e., reduce) the model's mean squared error. This type of penalty can  
266 reduce the value of some coefficients to zero, eliminating them from the model and providing a  
267 method of variable selection. To implement this procedure, we used the R package glmnet (64).  
268 Maternal and fetal measures were standardized around the mean and standard deviation before  
269 building each model. Each fetal measure was used as the response variable and maternal measures as  
270 the explanatory variables; we included an interaction term between the maternal measures and fetal  
271 sex for each maternal measure within the model. Since complete data are needed for LASSO  
272 regularization, each model was estimated using only samples with complete data (minimum  $n = 5$ ,  
273 median  $n = 7$ ) and the best  $\lambda$  value was selected based on the model with the lowest mean  
274 squared error. Maternal variables selected by the LASSO procedure were then run in univariate  
275 Anova models against the fetal variable using the full dataset ( $n = 11$ ),  $P$  values were compiled and  
276 FDR correction was applied using the Benjamini-Hochberg procedure. A similar method was applied  
277 to compare the fetal measures to each other, however, since only 4 fetal samples had complete data,  
278 the fetal measures were broken into three separate datasets: miRNA (33 measures, both liver and  
279 placenta), fetal mRNA levels (27 measures), and other measures (fetal weight, heart weight, and liver  
280 TGs); fetal sex was included as an interaction term for all models. Comparisons between the fetal  
281 miRNA were performed using the liver miRNA measures as the response variable and placental  
282 miRNA as the predictor. After breaking up the fetal dataset, we performed the following  
283 comparisons: fetal miRNA vs. mRNA, miRNA vs. other measures, and mRNA vs. other measures;  
284 sample sizes used for each LASSO procedure reached a minimum of 5, median of 7 datapoints for  
285 these comparisons.

286 LASSO regularization was also used for variable selection to compare the maternal microbiota  
287 ( $n = 10$ ) to maternal and fetal measures. To compare the maternal measures to the maternal

288 microbiome, we utilized the R package mpath (65) to perform the LASSO procedure using a negative  
289 binomial regression model. Briefly, the microbiota were classified to the taxonomic family and genus  
290 levels and filtered to include taxa which were present in at least 50% of the samples and reached at  
291 least 1% relative abundance. The microbiota count data were used for input into the glmregNB  
292 function for LASSO regularization with default values, and the best model was selected using the  
293 Bayesian information criterion. Again, only complete sets of data were used in the LASSO procedure  
294 ( $n = 6$ ). Variables selected for each taxon were run in a univariate negative binomial regression with  
295 the R package MASS (66) using the full dataset ( $n = 10$ ).  $P$  values were compiled and FDR  
296 correction was applied using the Benjamini-Hochberg procedure. LASSO models were constructed  
297 using only complete datasets, while statistics were run on the full dataset. To compare fetal measures  
298 as an outcome of the maternal microbiota abundances, we used arcsin square root transformation of  
299 the microbiota relative abundance data (67) as predictors for the infant measures. LASSO  
300 regularization was used to build these models using glmnet and univariate Anova models were used  
301 to test for significance as described in the previous paragraph. The samples sizes used for LASSO  
302 regularization between maternal microbiota and infant measures are as follows: fetal miRNA,  $n = 8$ ;  
303 fetal mRNA,  $n = 6$ ; and other fetal measures (weight, heart weight, and liver TGs),  $n = 8$ . Fetal sex  
304 was included as an interaction term within these models.

## 305 **Results**

### 306 **WD induces inflammation in dams, placenta, and fetuses and impairs lipid metabolism**

307 The time (days) from initiation of WD to IVGTT (carried out at 0.6 G) ranged from 276 to  
308 480 days ( $332 \pm 39$  d); the time from initiation of WD to cesarean section (carried out at 0.9 G)  
309 ranged from 324 to 535 days ( $386.5 \pm 39$  d). Despite this duration of exposure to WD/high fructose,  
310 at 0.6 G, no significant difference in maternal body weight (**Fig. 1A**) or in adiposity index (sum of  
311 skin fold thickness, **Fig. 1B**) was observed. These findings are consistent with those reported by the  
312 Nathanielsz lab (68, 69) using a similar diet and baboon model, demonstrating that attainment of  
313 maternal obesity requires a minimum of 9 mo. to ~3 years of WD feeding. Although WD-fed (mWD)  
314 dams did not become obese, serum CRP (**Fig. 1C**) and neutrophils (**Fig. 1D**) increased, without a  
315 change in serum IL-6 (**Fig. 1E**), indicative of mild, systemic inflammation in response to WD, prior  
316 to attaining obesity. WD-fed dams also exhibited elevated serum TGs (**Fig. 1F**). Serum HDL  
317 cholesterol and LDL/VLDL cholesterol were significantly higher in mWD dams compared with CD-  
318 fed (mCD) dams; however, no significant change in total cholesterol was observed (**Fig. 1G**). Blood  
319 glucose tolerance tests did not show a significant effect of diet (**Fig. 1H**). Together, these findings  
320 demonstrate that a relatively short exposure to WD during pregnancy induces significant systemic  
321 inflammation and impaired lipid metabolism in baboon dams prior to a significant change in  
322 adiposity or insulin sensitivity.

323 Given the markers for inflammation observed in dams on WD, we performed  
324 immunofluorescence on fixed placental sections obtained at cesarean section using an antibody to  
325 MAC387 to label infiltrating monocytes/ macrophages. We observed very few MAC387+  
326 macrophages in mCD placentas (**Fig. 2A**). Macrophage infiltration was more variable in the placenta  
327 of mWD dams, with notable macrophages evident in 3 of 5 placentas whilst macrophage presence in  
328 two placentas was comparable with those of mCD placentas (**Fig. 2A, right panel**). Expression of  
329 cytokines/chemokines (*IL1B*, *IL6*, *TNF*, *IL8*) in placental tissue (**Fig. 2B**) were elevated in mWD  
330 placenta but differences did not reach significance when compared with mCD placenta. However,  
331 both *IL6* ( $P = 0.08$ ) and *TNF* ( $P = 0.068$ ) exhibited trends for significance. No notable gross placental  
332 pathologies (calcifications, infarcts) were observed in mWD placentas compared with mCD  
333 placentas.



334 We next tested whether maternal exposure to WD influenced fetal liver health. Liver lipids  
335 were histologically evident in mWD-exposed fetal livers (**Fig. 2C, upper panel**) and verified by  
336 increased LipidSpot staining (**Fig. 2C, lower panel**) and by triglyceride analysis (**Fig. 2D**).  
337 Picrosirius red staining, an indicator for fibrosis, was strikingly more evident in mWD fetal liver (**Fig.**  
338 **2C, middle panel**). Expression of mRNA for genes involved in inflammation (*IL6*), fibrosis  
339 (*COL3A1*), and monocyte infiltration (*CCR2*) was elevated in fetal livers from WD-fed dams (**Fig.**  
340 **2D**), although only *CCR2* expression was significant between groups. Together, these data suggest  
341 that exposure to mWD in utero promotes triglyceride storage, a trend for increased inflammation, and  
342 early fibrogenesis, which are hallmarks of NAFLD/NASH changes in the fetal liver.

### 343 **Maternal WD induces subtle microbiota changes in dams**

344 At 0.6 G, maternal fecal SCFA levels did not differ between diets for propionate and butyrate,  
345 but there was an increase in acetate load in the feces of WD-fed dams (**Fig. 3A**). Using 16S  
346 sequencing, we found that the maternal gut microbiome was mainly comprised of *Lactobacillales*  
347 and *Clostridiales*, with modest changes in microbial composition between groups (**Fig. 3B**).  
348 Exposure to WD resulted in significantly lower alpha diversity (**Fig. 4A**) but no community-wide  
349 differences between CD and WD groups as measured by beta diversity (PERMANOVA *P* value =  
350 0.26; **Fig. 4B**). Comparing microbiota abundances between diets, feces from mWD dams were  
351 enriched in *Acidaminococcus* and unclassified *Betaproteobacteria*, while those from mCD dams  
352 were characterized by higher *Anaeroplasmatales* abundance (**Fig. 4C**). Using PICRUST to predict  
353 functional pathways, we found 11 pathways potentially differentiating the effect of diet on the  
354 maternal gut microbes. WD-exposed microbiota were predicted to have enrichment of biosynthesis  
355 pathways such as gluconeogenesis and aspartate/asparagine synthesis, whereas CD feeding was  
356 associated with enrichment of pathways for rhamnose biosynthesis, lactose/galactose degradation,  
357 and bacterial-specific biosynthesis of peptidoglycans (*Staphylococci*) and O-antigen (*Escherichia*  
358 *coli*; **Fig. 4C**).

### 359 **Maternal WD alters placental and fetal miRNA profiles**

360 Mounting evidence indicates that miRNAs mediate gut microbiome-host molecular  
361 communications (70). We sought to explore differences in a targeted set of miRNAs in placenta and  
362 fetus associated with maternal diet. We selected miRNAs that were previously found to be  
363 differentially expressed in fetal liver in a study in baboons in which the dams were obese, as well  
364 miRNAs shown to be regulated by the gut microbiome (miR-122-5p, miR-204-5p, and miR-34a-5p)  
365 (71-74) or associated with NASH in rodents and humans (miR-21-5p and miR-29a-3p) (75-78).  
366 MiRNA expression analysis in fetal liver tissue (**Fig. 5A**) revealed a significant downregulation of  
367 miR-204-5p and miR-145-3p expression upon mWD exposure. In the placenta, we observed a  
368 significant downregulation of miR-183-5p and miR-182-5p in the WD-fed group (**Fig. 5B**). In  
369 placental tissue, miR-199a-5p showed a trend for downregulation (*P* = 0.057). The expression levels  
370 of miR-183-5p, miR-182-5p and miR-199a-5p were directionally similar in both fetal liver and in the  
371 placenta, as was the increase in expression of miR-1285-3p.

### 372 **Associations between microbiota, miRNA, metabolic features and fetal liver gene expression**

373 We first analyzed associations between maternal parameters of systemic and lipid metabolism  
374 to maternal microbiota and placental miRNAs (**Table 1**). After FDR correction, only unclassified  
375 *Rickettsiales* and unclassified *Verrucomicrobia* were significantly and positively associated with  
376 maternal HDL and *Desulfovibrionaceae* was positively associated with placental weight. Next, we  
377 analyzed associations between maternal parameters of systemic and lipid metabolism and fetal liver  
378 TG, miRNA, and mRNA levels (**Table 2**). Fetal liver TGs were positively associated with maternal

379 TGs, HDL, and LDL/VLDL. After FDR correction, only the comparison between fetal liver TGs and  
380 maternal LDL/VLDL remained significant. We next compared fetal liver TGs to fetal liver/placental  
381 miRNAs and fetal liver mRNA levels (**Table 3**); however, after FDR correction, none of these  
382 comparisons were significant. In our analysis of fetal liver expression levels of miRNA and mRNA,  
383 we found several placental and fetal miRNAs associated with markers of lipid metabolism, oxidative  
384 stress, inflammation, and fibrosis (**Table 4**). The most common miRNA associated with liver mRNA  
385 levels was miR-1285-3p. Liver miR-1285-3p was negatively associated with *NFE2L2*, *ICAM1*, and  
386 *VCAM1*, but positively associated with *IL6*. Placental miR-1285-3p was positively associated with  
387 *NFE2L2* and negatively associated with *FAP*. After FDR correction, only the association between  
388 miR-1285-3p and *IL6* mRNA was significant, though several other associations were trending  
389 towards significance (**Table 4**). We next compared fetal liver miRNA levels and relative abundance  
390 of maternal microbiota at the taxonomic family level and found miR-122-5p was positively  
391 associated with *Succinivibrionaceae* (**Table 5**). Placental miR-1285-3p was positively associated  
392 with *Coriobacteriaceae* and *Prevotellaceae*. Both taxa displayed sex differences in association with  
393 placental miR-1285-3p, where males remained positively associated (*Coriobacteriaceae*,  $r_2 = 0.57$ ;  
394 *Prevotellaceae*,  $r_2 = 0.70$ ) but females showed no association ( $r_2 = 0$  for both taxa). After FDR  
395 correction, only placental miR-1285-3p remained significantly associated with *Coriobacteriaceae*,  
396 *Prevotellaceae*, and their interactions with sex. Fetal liver miR-122-5p and *Succinivibrionaceae*  
397 showed a trend toward association after FDR correction ( $P < 0.1$ ). At the genus level, fetal liver miR-  
398 122-5p remained negatively associated with *Blautia* levels and positively associated with  
399 *Ruminococcus* after FDR correction. No other genera were selected for inclusion in our LASSO  
400 models for any of the other miRNA measured.

## 401 Discussion

402 Epigenetic patterning in the placenta and fetus resulting from a Western-style maternal diet  
403 may be influenced by maternal gut microbes to promote the development of offspring NAFLD;  
404 however, these relationships are poorly described in human-relevant models. Our study using the  
405 Olive baboon, in which dams were fed either a CD or WD prior to and during pregnancy, is the first  
406 to investigate early associations between the microbiota, placental-fetal miRNAs, and maternal-fetal  
407 metabolic dysregulation. Despite ~1 year of mWD, the dams did not display significant weight gain  
408 or adipose deposition, consistent with similar studies in baboons (69) and Japanese macaques (79)  
409 where obesity was attained following 2 to 3 years of WD feeding. Strikingly, in the absence of  
410 obesity, we found that mWD adversely affected lipid metabolism and inflammation along the  
411 maternal-placental-fetal axis, concomitant with decreased miR-182-5p and miR-183-5p in mWD  
412 placentas compared with mCD placentas. Previous studies in NHP have not focused on miRNAs in  
413 placenta and their association with fetal liver function. We found the reduced placental expression  
414 levels of the miR-183 family (including miR-182-5p and miR-183-5p) to be positively associated  
415 with expression of a number of NAFLD/NASH-relevant genes in the fetal liver; this family was  
416 shown to attenuate pathophysiology in a mouse model of NASH (80) and may therefore be a novel  
417 target for future mechanistic studies in our rodent models. We also found significant associations  
418 between the maternal microbiota and placental miR-1285-3p, an miRNA associated with promotion  
419 of postnatal growth in infants born to mothers with obesity (81). Livers from fetuses of WD-fed dams  
420 showed increased steatosis and elevated expression levels of genes involved in macrophage  
421 infiltration, inflammation, and fibrosis. These fetal NAFLD indices were increased concomitant with  
422 downregulation of hepatic expression of miR-204-5p, an miRNA known to be regulated by gut  
423 microbes (74).

424 Although mechanisms are not fully elucidated, the gut microbiome influences the development  
425 of chronic inflammatory diseases such as obesity through a variety of host pathways, including by  
426 mediating the expression of host miRNAs (82). The effects of maternal obesity on the offspring  
427 microbiome were previously described in Japanese macaques (31, 83), but potential effects of the  
428 maternal microbiome on altering epigenetic marks in the placenta or fetus are undetermined. In our  
429 model of short-duration WD-feeding, the maternal microbiota were dominated by *Firmicutes*,  
430 primarily *Lactobacilliales*, *Clostridiales*, and *Bacteroidales*, strongly implicated in the maintenance  
431 of overall gut function and health (84, 85). In the absence of maternal obesity, we found several  
432 associations between the maternal gut microbiota and maternal serum TGs, HDL, LDL/VLDL, and  
433 CRP. Similar to our findings associating *Desulfovibrionaceae* abundance with placental weight in  
434 baboons, the genus *Desulfovibrio* is enriched in women with GDM (86, 87); notably, GDM is  
435 associated with increased placental weight (88). We found placental miR-1285-3p was associated  
436 with maternal gut microbiota abundances of *Coriobacteriaceae* and *Prevotellaceae*, both of which  
437 displayed a positive relationship with postnatal growth-promoting (81) miR-1285-3p expression in  
438 placenta from male fetuses, but no association in females. Both of these bacterial families are  
439 metabolically active members of the gut microbiome. MiR-122 accounts for around 70% of all  
440 miRNAs in the adult liver and plays a role in regulation of innate immunity (89), proliferation and  
441 differentiation of hepatocytes (90), lipid accumulation, and cholesterol metabolism (91). We found a  
442 differential association between fetal liver miR-122-5p and two maternal gut genera, *Blautia* and  
443 *Ruminococcus*, where *Blautia* negatively associated with miR-122-5p and *Ruminococcus* positively  
444 associated with miR-122-5p. Decreased *Blautia* abundance was associated with obesity and intestinal  
445 inflammation in children (92) and *Blautia* species abundances have been associated with lowered  
446 visceral fat accumulation in human adults (93). Conversely, *Ruminococcus* was positively associated  
447 with visceral fat accumulation (94). Determining whether miR-1285-3p and miR-122-5p are early  
448 biomarkers for programmed obesity and NAFLD that may be regulated by maternal genera such as  
449 *Blautia* and *Ruminococcus* is an important avenue for future exploration.

450 Compared with mCD dams, mWD dams exhibited dyslipidaemia, characterized by elevated  
451 LDL cholesterol and TGs. However, based on the IVGTT at 0.6 G, these dams did not show indices  
452 of insulin resistance. These findings are supported by the observations of Short et al., wherein young  
453 (5-6 years of age) male baboons fed a WD (high in monosaccharides and saturated fatty acids) for  
454 eight weeks exhibited elevated levels of HDL and LDL/VLDL cholesterol and TGs, without a change  
455 in body weight or blood glucose (95). Short et al. also noted significant effects on inflammatory  
456 indices, with enhanced CD14+ mononuclear cell chemotaxis as well as a significant increase in blood  
457 neutrophils (95). We similarly found that mWD dams had mild, systemic inflammation, exemplified  
458 by elevated levels of CRP and increased neutrophil counts, which was consistent with some of the  
459 changes in cytokine profiles known to be exacerbated by maternal obesity. These observations  
460 suggest that upregulation of at least some pro-inflammatory programs during pregnancy are mediated  
461 by the diet alone.

462 Our finding of a trend for increased numbers of macrophages in the placentas of WD-fed  
463 dams is suggestive of enhanced chemoattraction of maternal monocytes or fetal monocytes/Hofbauer  
464 cells to the placenta, or activation of maternal peripheral monocytes that target the placenta, and is  
465 consistent with previous findings of monocyte priming and enhanced monocyte chemotaxis in male  
466 baboons fed a WD for eight weeks (95). Peripheral monocytes from obese pregnancies displayed  
467 elevated chemokine receptor expression and enhanced migration capacity (23). Further, placental  
468 resident CD14+ and CD68+ mononuclear cells (macrophages) increased 2- to 3-fold in obese  
469 pregnancies (23, 96). Previously, Frias and colleagues noted increased placental inflammatory

470 cytokine expression and placental infarctions in the Japanese macaque model of chronic WD feeding  
471 and maternal obesity (97). We did not specifically address monocyte priming in the current study;  
472 however, we did note that mRNA expression of both *TNF* and *IL8* mRNA was elevated mWD  
473 placentas, consistent with WD-induced ‘priming’ of placental inflammation (in combination with  
474 recruitment of macrophages). We also did not find notable gross placental pathologies (calcifications,  
475 infarcts) in mWD placentas compared with mCD placentas.

476 Our novel study has several strengths including our use of the Olive baboon as a translational  
477 model for developmental programming. An advantage over rodents, baboons are similar to humans  
478 in gestational duration, placentation (hemochorial monodiscoid), singleton births, hormone profiles,  
479 and social behaviors. Further, our model allowed us to address the role of mWD independent from  
480 maternal obesity in nulliparous females. One drawback of this study is the small sample size which  
481 limited the conclusions we could draw from our analyses. In a baboon model where maternal obesity  
482 was attained, Puppala et al. showed a trend toward increased hepatic lipid accumulation and more  
483 severe steatosis, assessed histologically, that did not progress toward NASH in the fetus (48). This is  
484 in contrast to our findings and those of Wesolowski et al. (12) and McCurdy et al. (79) in obese  
485 Japanese macaques where fetuses from WD-fed dams had higher hepatic TGs associated with  
486 impaired mitochondrial function and increased fibrogenesis, which Nash et al. demonstrated was  
487 localized to the hepatic periportal region (98).

488 In contrast to our findings using a targeted analysis, Puppala et al. used an untargeted  
489 microarray-based approach and found that miR-145-3p was upregulated in livers from baboon  
490 fetuses exposed to maternal obesity and associated with a decrease in SMAD4; they additionally  
491 reported an increase in miR-182-5p and -183-5p (48). Our findings are also consistent with  
492 observations previously reported in obese Japanese macaques where a differential response to high-  
493 fat diet in dams was found, allowing segregation into insulin-sensitive and insulin-resistant  
494 subgroups (99). Maternal insulin resistance (elevated TGs, insulin, and weight gain) led to activation  
495 of de novo lipogenic and pro-inflammatory pathways in offspring liver at 1 year of age (99).  
496 Moreover, Elsakar et al. showed that prolonged WD feeding, multiple diet switches, and increasing  
497 age and parity were associated with increased insulin resistance in dams (100). The dams in our  
498 study, subjected to a relatively short-duration exposure to WD, were not insulin resistant and did not  
499 have significant weight gain compared with matched CD-fed dams; although the effects we observed  
500 in the fetal liver were modest, they are striking given the maternal exposures were limited.

501 We conclude that, prior to the onset of obesity, a WD initiated several months preceding  
502 gestation and maintained over its course causes perturbed maternal lipid homeostasis and impacted  
503 maternal gut microbiota composition. Both maternal metabolic parameters and maternal gut  
504 microbiota were associated with expression of fetal liver miRNA and mRNA that are markers for  
505 lipid metabolism, oxidative stress, and inflammation, suggesting that maternal diet, in the absence of  
506 obesity, has significant consequences for epigenetic regulation of fetal and infant health.

507

508 **Conflict of Interest**

509 The authors declare that the research was conducted in the absence of any commercial or financial  
510 relationships that could be construed as a potential conflict of interest.

511 **Author Contributions**

512 JP, JF, KJ, and DM contributed to conception and design of the study. KS, AM, RJ, MC-C, and KJ  
513 contributed to writing the original draft of the manuscript. SG, JP, and DM collected maternal data.  
514 RJ, SG, MD, and RB performed experiments. KS, MT, and DD performed microbiome and  
515 association analyses. DD, M-PA, JF, and DM contributed to supervision of the study. All authors  
516 contributed to the article and approved of the submitted version.

517 **Funding**

518 Funding for this study was received from the Harold Hamm Foundation/Presbyterian Hospital  
519 Foundation, grant 20211471 (DM, JF, KJ, JP, DD, M-PA).

520 **Acknowledgments**

521 We thank the OUHSC Stephenson Cancer Tissue Pathology Core, supported partly by NIGMS  
522 P20GM103639 and NCI P30CA225520, for the liver histology. We thank for OUHSC Laboratory  
523 for Molecular Biology and Cytometry Research core for library construction and sequencing.

524 **Data Availability Statement**

525 Data supporting this study will be made available by the corresponding author, KJ, upon request. 16S  
526 sequencing data is available from the NIH Sequence Read Archive (Accession number in progress).

## 527 **References**

- 528 1. Pierantonelli I, Svegliati-Baroni G. Nonalcoholic fatty liver disease: basic pathogenetic  
529 mechanisms in the progression from NAFLD to NASH. *Transplantation* (2019) 103(1):e1-e13. doi:  
530 10.1097/tp.0000000000002480.
- 531 2. Catalano P, deMouzon SH. Maternal obesity and metabolic risk to the offspring: why lifestyle  
532 interventions may have not achieved the desired outcomes. *Int J Obes (Lond)* (2015) 39(4):642-9.  
533 doi: 10.1038/ijo.2015.15.
- 534 3. Chang E, Hafner H, Varghese M, Griffin C, Clemente J, Islam M, et al. Programming effects  
535 of maternal and gestational obesity on offspring metabolism and metabolic inflammation. *Sci Rep*  
536 (2019) 9(1):16027. doi: 10.1038/s41598-019-52583-x.
- 537 4. Segovia SA, Vickers MH, Gray C, Reynolds CM. Maternal obesity, inflammation, and  
538 developmental programming. *Biomed Res Int* (2014) 2014:418975. doi: 10.1155/2014/418975.
- 539 5. Parisi F, Milazzo R, Savasi VM, Cetin I. Maternal low-grade chronic inflammation and  
540 intrauterine programming of health and disease. *Int J Mol Sci* (2021) 22(4). doi:  
541 10.3390/ijms22041732.
- 542 6. Cuzmar V, Alberti G, Uauy R, Pereira A, García C, De Barbieri F, et al. Early obesity: risk  
543 factor for fatty liver disease. *J Pediatr Gastroenterol Nutr* (2020) 70(1):93-8. doi:  
544 10.1097/mpg.0000000000002523.
- 545 7. Hanson MA, Gluckman PD. Early developmental conditioning of later health and disease:  
546 physiology or pathophysiology? *Physiol Rev* (2014) 94(4):1027-76. doi:  
547 10.1152/physrev.00029.2013.
- 548 8. Cunningham SA, Kramer MR, Narayan KM. Incidence of childhood obesity in the United  
549 States. *N Engl J Med* (2014) 370(5):403-11. doi: 10.1056/NEJMoa1309753.
- 550 9. Anderson EL, Howe LD, Jones HE, Higgins JP, Lawlor DA, Fraser A. The prevalence of  
551 non-alcoholic fatty liver disease in children and adolescents: A systematic review and meta-analysis.  
552 *PLoS One* (2015) 10(10):e0140908. doi: 10.1371/journal.pone.0140908.
- 553 10. Freinkel N. Banting Lecture 1980. Of pregnancy and progeny. *Diabetes* (1980) 29(12):1023-  
554 35.
- 555 11. Thompson MD, Derse A, Ferey J, Reid M, Xie Y, Christ M, et al. Transgenerational impact  
556 of maternal obesogenic diet on offspring bile acid homeostasis and nonalcoholic fatty liver disease.  
557 *Am J Physiol Endocrinol Metab* (2019) 316(4):E674-e86. doi: 10.1152/ajpendo.00474.2018.
- 558 12. Wesolowski SR, Mulligan CM, Janssen RC, Baker PR, II, Bergman BC, D'Alessandro A, et  
559 al. Switching obese mothers to a healthy diet improves fetal hypoxemia, hepatic metabolites, and  
560 lipotoxicity in non-human primates. *Mol Metab* (2018) 18:25-41. doi:  
561 10.1016/j.molmet.2018.09.008.
- 562 13. Wankhade UD, Zhong Y, Kang P, Alfaro M, Chintapalli SV, Thakali KM, et al. Enhanced  
563 offspring predisposition to steatohepatitis with maternal high-fat diet is associated with epigenetic  
564 and microbiome alterations. *PLoS One* (2017) 12(4):e0175675. doi: 10.1371/journal.pone.0175675.
- 565 14. Mennitti LV, Carpenter AAM, Loche E, Pantaleão LC, Fernandez-Twinn DS, Schoonejans  
566 JM, et al. Effects of maternal diet-induced obesity on metabolic disorders and age-associated miRNA  
567 expression in the liver of male mouse offspring. *Int J Obes (Lond)* (2022) 46(2):269-78. doi:  
568 10.1038/s41366-021-00985-1.

- 569 15. Schoonejans JM, Ozanne SE. Developmental programming by maternal obesity: Lessons  
570 from animal models. *Diabet Med* (2021) 38(12):e14694. doi: 10.1111/dme.14694.
- 571 16. Aye IL, Lager S, Ramirez VI, Gaccioli F, Dudley DJ, Jansson T, et al. Increasing maternal  
572 body mass index is associated with systemic inflammation in the mother and the activation of distinct  
573 placental inflammatory pathways. *Biol Reprod* (2014) 90(6):129. doi:  
574 10.1095/biolreprod.113.116186.
- 575 17. Goldstein JA, Gallagher K, Beck C, Kumar R, Gernand AD. Maternal-fetal inflammation in  
576 the placenta and the developmental origins of health and disease. *Front Immunol* (2020) 11:531543.  
577 doi: 10.3389/fimmu.2020.531543.
- 578 18. Goeden N, Velasquez J, Arnold KA, Chan Y, Lund BT, Anderson GM, et al. Maternal  
579 inflammation disrupts fetal neurodevelopment via increased placental output of serotonin to the fetal  
580 brain. *J Neurosci* (2016) 36(22):6041-9. doi: 10.1523/jneurosci.2534-15.2016.
- 581 19. Sauder MW, Lee SE, Schulze KJ, Christian P, Wu LSF, Khattry SK, et al. Inflammation  
582 throughout pregnancy and fetal growth restriction in rural Nepal. *Epidemiol Infect* (2019) 147:e258.  
583 doi: 10.1017/s0950268819001493.
- 584 20. Burton GJ, Jauniaux E. Pathophysiology of placental-derived fetal growth restriction. *Am J*  
585 *Obstet Gynecol* (2018) 218(2s):S745-s61. doi: 10.1016/j.ajog.2017.11.577.
- 586 21. Pique-Regi R, Romero R, Tarca AL, Sandler ED, Xu Y, Garcia-Flores V, et al. Single cell  
587 transcriptional signatures of the human placenta in term and preterm parturition. *Elife* (2019) 8. doi:  
588 10.7554/eLife.52004.
- 589 22. Miller D, Gershater M, Slutsky R, Romero R, Gomez-Lopez N. Maternal and fetal T cells in  
590 term pregnancy and preterm labor. *Cell Mol Immunol* (2020) 17(7):693-704. doi: 10.1038/s41423-  
591 020-0471-2.
- 592 23. Challier JC, Basu S, Bintein T, Minium J, Hotmire K, Catalano PM, et al. Obesity in  
593 pregnancy stimulates macrophage accumulation and inflammation in the placenta. *Placenta* (2008)  
594 29(3):274-81. doi: 10.1016/j.placenta.2007.12.010.
- 595 24. Trøseid M, Nestvold TK, Rudi K, Thoresen H, Nielsen EW, Lappegård KT. Plasma  
596 lipopolysaccharide is closely associated with glycemic control and abdominal obesity: evidence from  
597 bariatric surgery. *Diabetes Care* (2013) 36(11):3627-32. doi: 10.2337/dc13-0451.
- 598 25. Firmal P, Shah VK, Chattopadhyay S. Insight into TLR4-mediated immunomodulation in  
599 normal pregnancy and related disorders. *Front Immunol* (2020) 11:807. doi:  
600 10.3389/fimmu.2020.00807.
- 601 26. Collado MC, Isolauri E, Laitinen K, Salminen S. Distinct composition of gut microbiota  
602 during pregnancy in overweight and normal-weight women. *Am J Clin Nutr* (2008) 88(4):894-9. doi:  
603 10.1093/ajcn/88.4.894.
- 604 27. Dreisbach C, Morgan H, Cochran C, Gyamfi A, Henderson WA, Prescott S. Metabolic and  
605 microbial changes associated With diet and obesity during pregnancy: What can we learn from  
606 animal studies? *Front Cell Infect Microbiol* (2021) 11:795924. doi: 10.3389/fcimb.2021.795924.
- 607 28. Wu N, Zhou J, Mo H, Mu Q, Su H, Li M, et al. The gut microbial signature of gestational  
608 diabetes mellitus and the association with diet intervention. *Front Cell Infect Microbiol* (2021)  
609 11:800865. doi: 10.3389/fcimb.2021.800865.
- 610 29. Nuriel-Ohayon M, Neuman H, Koren O. Microbial changes during pregnancy, birth, and  
611 infancy. *Front Microbiol* (2016) 7:1031. doi: 10.3389/fmicb.2016.01031.

- 612 30. Chu DM, Meyer KM, Prince AL, Aagaard KM. Impact of maternal nutrition in pregnancy  
613 and lactation on offspring gut microbial composition and function. *Gut Microbes* (2016) 7(6):459-70.  
614 doi: 10.1080/19490976.2016.1241357.
- 615 31. Ma J, Prince AL, Bader D, Hu M, Ganu R, Baquero K, et al. High-fat maternal diet during  
616 pregnancy persistently alters the offspring microbiome in a primate model. *Nat Commun* (2014)  
617 5:3889. doi: 10.1038/ncomms4889.
- 618 32. Soderborg TK, Clark SE, Mulligan CE, Janssen RC, Babcock L, Ir D, et al. The gut  
619 microbiota in infants of obese mothers increases inflammation and susceptibility to NAFLD. *Nat*  
620 *Commun* (2018) 9(1):4462. doi: 10.1038/s41467-018-06929-0.
- 621 33. Coppola S, Avagliano C, Calignano A, Berni Canani R. The protective role of butyrate  
622 against obesity and obesity-related diseases. *Molecules* (2021) 26(3). doi:  
623 10.3390/molecules26030682.
- 624 34. Chen J, Vitetta L. Gut microbiota metabolites in NAFLD pathogenesis and therapeutic  
625 implications. *Int J Mol Sci* (2020) 21(15). doi: 10.3390/ijms21155214.
- 626 35. Chu H, Duan Y, Yang L, Schnabl B. Small metabolites, possible big changes: a microbiota-  
627 centered view of non-alcoholic fatty liver disease. *Gut* (2019) 68(2):359-70. doi: 10.1136/gutjnl-  
628 2018-316307.
- 629 36. Sanidad KZ, Zeng MY. Neonatal gut microbiome and immunity. *Curr Opin Microbiol* (2020)  
630 56:30-7. doi: 10.1016/j.mib.2020.05.011.
- 631 37. Wang YW, Yu HR, Tiao MM, Tain YL, Lin IC, Sheen JM, et al. Maternal obesity related to  
632 high fat diet induces placenta remodeling and gut microbiome shaping that are responsible for fetal  
633 liver lipid dysmetabolism. *Front Nutr* (2021) 8:736944. doi: 10.3389/fnut.2021.736944.
- 634 38. Bedell S, Hutson J, de Vrijer B, Eastabrook G. Effects of maternal obesity and gestational  
635 diabetes mellitus on the placenta: Current knowledge and targets for therapeutic interventions. *Curr*  
636 *Vasc Pharmacol* (2021) 19(2):176-92. doi: 10.2174/1570161118666200616144512.
- 637 39. Gohir W, Kennedy KM, Wallace JG, Saoi M, Bellissimo CJ, Britz-McKibbin P, et al. High-  
638 fat diet intake modulates maternal intestinal adaptations to pregnancy and results in placental  
639 hypoxia, as well as altered fetal gut barrier proteins and immune markers. *J Physiol* (2019)  
640 597(12):3029-51. doi: 10.1113/jp277353.
- 641 40. Liong S, Lappas M. Lipopolysaccharide and double stranded viral RNA mediate insulin  
642 resistance and increase system a amino acid transport in human trophoblast cells in vitro. *Placenta*  
643 (2017) 51:18-27. doi: 10.1016/j.placenta.2017.01.124.
- 644 41. Kato E, Yamamoto T, Chishima F. Effects of cytokines and TLR ligands on the production of  
645 PIGF and sVEGFR1 in primary trophoblasts. *Gynecol Obstet Invest* (2017) 82(1):39-46. doi:  
646 10.1159/000446279.
- 647 42. Seki Y, Suzuki M, Guo X, Glenn AS, Vuguin PM, Fiallo A, et al. In utero exposure to a high-  
648 fat diet programs hepatic hypermethylation and gene dysregulation and development of metabolic  
649 syndrome in male mice. *Endocrinology* (2017) 158(9):2860-72. doi: 10.1210/en.2017-00334.
- 650 43. Goldberg AD, Allis CD, Bernstein E. Epigenetics: a landscape takes shape. *Cell* (2007)  
651 128(4):635-8. doi: 10.1016/j.cell.2007.02.006.
- 652 44. Wu J, Nagy LE, Liangpunsakul S, Wang L. Non-coding RNA crosstalk with nuclear  
653 receptors in liver disease. *Biochim Biophys Acta Mol Basis Dis* (2021) 1867(5):166083. doi:  
654 10.1016/j.bbdis.2021.166083.



- 655 45. Gjorgjieva M, Sobolewski C, Dolicka D, Correia de Sousa M, Foti M. miRNAs and NAFLD:  
656 from pathophysiology to therapy. *Gut* (2019) 68(11):2065-79. doi: 10.1136/gutjnl-2018-318146.
- 657 46. Roderburg C, Urban GW, Bettermann K, Vucur M, Zimmermann H, Schmidt S, et al. Micro-  
658 RNA profiling reveals a role for miR-29 in human and murine liver fibrosis. *Hepatology* (2011)  
659 53(1):209-18. doi: 10.1002/hep.23922.
- 660 47. Mandala A, Janssen RC, Palle S, Short KR, Friedman JE. Pediatric non-alcoholic fatty liver  
661 disease: Nutritional origins and potential molecular mechanisms. *Nutrients* (2020) 12(10):3166. doi:  
662 10.3390/nu12103166.
- 663 48. Puppala S, Li C, Glenn JP, Saxena R, Gawrieh S, Quinn A, et al. Primate fetal hepatic  
664 responses to maternal obesity: epigenetic signalling pathways and lipid accumulation. *J Physiol*  
665 (2018) 596(23):5823-37. doi: 10.1113/jp275422.
- 666 49. Doridot L, Houry D, Gaillard H, Chelbi ST, Barbaux S, Vaiman D. miR-34a expression,  
667 epigenetic regulation, and function in human placental diseases. *Epigenetics* (2014) 9(1):142-51. doi:  
668 10.4161/epi.26196.
- 669 50. Maccani MA, Avissar-Whiting M, Banister CE, McGonnigal B, Padbury JF, Marsit CJ.  
670 Maternal cigarette smoking during pregnancy is associated with downregulation of miR-16, miR-21,  
671 and miR-146a in the placenta. *Epigenetics* (2010) 5(7):583-9. doi: 10.4161/epi.5.7.12762.
- 672 51. Avissar-Whiting M, Veiga KR, Uhl KM, Maccani MA, Gagne LA, Moen EL, et al.  
673 Bisphenol A exposure leads to specific microRNA alterations in placental cells. *Reprod Toxicol*  
674 (2010) 29(4):401-6. doi: 10.1016/j.reprotox.2010.04.004.
- 675 52. Shah KB, Chernausk SD, Teague AM, Bard DE, Tryggestad JB. Maternal diabetes alters  
676 microRNA expression in fetal exosomes, human umbilical vein endothelial cells and placenta.  
677 *Pediatr Res* (2020) 89(5):1157-63. doi: 10.1038/s41390-020-1060-x.
- 678 53. Tsamou M, Martens DS, Winckelmans E, Madhloum N, Cox B, Gyselaers W, et al. Mother's  
679 pre-pregnancy BMI and placental candidate miRNAs: Findings from the ENVIRONAGE Birth  
680 Cohort. *Sci Rep* (2017) 7(1):5548. doi: 10.1038/s41598-017-04026-8.
- 681 54. Li C, Jenkins S, Considine MM, Cox LA, Gerow KG, Huber HF, et al. Effect of maternal  
682 obesity on fetal and postnatal baboon (*Papio* species) early life phenotype. *J Med Primatol* (2019)  
683 48(2):90-8. doi: 10.1111/jmp.12396.
- 684 55. Rivera HM, Kievit P, Kirigiti MA, Bauman LA, Baquero K, Blundell P, et al. Maternal high-  
685 fat diet and obesity impact palatable food intake and dopamine signaling in nonhuman primate  
686 offspring. *Obesity (Silver Spring)* (2015) 23(11):2157-64. doi: 10.1002/oby.21306.
- 687 56. Bolyen E, Rideout JR, Dillon MR, Bokulich NA, Abnet CC, Al-Ghalith GA, et al.  
688 Reproducible, interactive, scalable and extensible microbiome data science using QIIME 2. *Nat*  
689 *Biotechnol* (2019) 37(8):852-7. doi: 10.1038/s41587-019-0209-9.
- 690 57. Callahan BJ, McMurdie PJ, Rosen MJ, Han AW, Johnson AJ, Holmes SP. DADA2: High-  
691 resolution sample inference from Illumina amplicon data. *Nat Methods* (2016) 13(7):581-3. doi:  
692 10.1038/nmeth.3869.
- 693 58. Katoh K, Standley DM. MAFFT multiple sequence alignment software version 7:  
694 improvements in performance and usability. *Mol Biol Evol* (2013) 30(4):772-80. doi:  
695 10.1093/molbev/mst010.
- 696 59. Price MN, Dehal PS, Arkin AP. FastTree 2--approximately maximum-likelihood trees for  
697 large alignments. *PLoS One* (2010) 5(3):e9490. doi: 10.1371/journal.pone.0009490.

- 698 60. Bokulich NA, Kaehler BD, Rideout JR, Dillon M, Bolyen E, Knight R, et al. Optimizing  
699 taxonomic classification of marker-gene amplicon sequences with QIIME 2's q2-feature-classifier  
700 plugin. *Microbiome* (2018) 6(1):90. doi: 10.1186/s40168-018-0470-z.
- 701 61. McDonald D, Price MN, Goodrich J, Nawrocki EP, DeSantis TZ, Probst A, et al. An  
702 improved Greengenes taxonomy with explicit ranks for ecological and evolutionary analyses of  
703 bacteria and archaea. *ISME J* (2012) 6(3):610-8. doi: 10.1038/ismej.2011.139.
- 704 62. Segata N, Izard J, Waldron L, Gevers D, Miropolsky L, Garrett WS, et al. Metagenomic  
705 biomarker discovery and explanation. *Genome Biol* (2011) 12(6):R60. doi: 10.1186/gb-2011-12-6-  
706 r60.
- 707 63. Tibshirani R. Regression shrinkage and selection via the lasso. *J R Statist Soc* (1996)  
708 58(1):267-88.
- 709 64. Friedman J, Hastie T, Tibshirani R. Regularization paths for generalized linear models via  
710 coordinate descent. *J Stat Softw* (2010) 33(1):1-22.
- 711 65. Wang Z. mpath: Regularized linear models. <https://CRAN.R-project.org/package=mpath>.  
712 2022.
- 713 66. Venables WN, Ripley BD. *Modern Applied Statistics with S*. 4 ed. New York, NY: Springer  
714 (2002).
- 715 67. Ahrens WH, Cox DJ, Budhwar G. Use of the arcsine and square root transformations for  
716 subjectively determined percentage data. *Weed Science* (1990) 38(4-5):452-8. doi:  
717 10.1017/S0043174500056824.
- 718 68. Li C, Jenkins S, Huber HF, Nathanielsz PW. Effect of maternal baboon (*Papio sp.*) dietary  
719 mismatch in pregnancy and lactation on post-natal offspring early life phenotype. *J Med Primatol*  
720 (2019) 48(4):226-35. doi: 10.1111/jmp.12415.
- 721 69. Maloyan A, Muralimanoharan S, Huffman S, Cox LA, Nathanielsz PW, Myatt L, et al.  
722 Identification and comparative analyses of myocardial miRNAs involved in the fetal response to  
723 maternal obesity. *Physiol Genomics* (2013) 45(19):889-900. doi:  
724 10.1152/physiolgenomics.00050.2013.
- 725 70. Williams MR, Stedtfeld RD, Tiedje JM, Hashsham SA. MicroRNAs-based inter-domain  
726 communication between the host and members of the gut microbiome. *Front Microbiol* (2017)  
727 8:1896. doi: 10.3389/fmicb.2017.01896.
- 728 71. Cossiga V, Lembo V, Nigro C, Mirra P, Miele C, D'Argenio V, et al. The combination of  
729 berberine, tocotrienols and coffee extracts improves metabolic profile and liver steatosis by the  
730 modulation of gut microbiota and hepatic miR-122 and miR-34a expression in mice. *Nutrients* (2021)  
731 13(4). doi: 10.3390/nu13041281.
- 732 72. Gaddam RR, Jacobsen VP, Kim YR, Gabani M, Jacobs JS, Dhuri K, et al. Microbiota-  
733 governed microRNA-204 impairs endothelial function and blood pressure decline during inactivity in  
734 db/db mice. *Sci Rep* (2020) 10(1):10065. doi: 10.1038/s41598-020-66786-0.
- 735 73. Li L, Li C, Lv M, Hu Q, Guo L, Xiong D. Correlation between alterations of gut microbiota  
736 and miR-122-5p expression in patients with type 2 diabetes mellitus. *Ann Transl Med* (2020)  
737 8(22):1481. doi: 10.21037/atm-20-6717.
- 738 74. Vikram A, Kim YR, Kumar S, Li Q, Kassan M, Jacobs JS, et al. Vascular microRNA-204 is  
739 remotely governed by the microbiome and impairs endothelium-dependent vasorelaxation by  
740 downregulating Sirtuin1. *Nat Commun* (2016) 7:12565. doi: 10.1038/ncomms12565.

- 741 75. Zhao J, Tang N, Wu K, Dai W, Ye C, Shi J, et al. MiR-21 simultaneously regulates ERK1  
742 signaling in HSC activation and hepatocyte EMT in hepatic fibrosis. *PLoS One* (2014)  
743 9(10):e108005. doi: 10.1371/journal.pone.0108005.
- 744 76. Lin H, Mercer KE, Ou X, Mansfield K, Buchmann R, Børshheim E, et al. Circulating  
745 microRNAs are associated with metabolic markers in adolescents with hepatosteatosis. *Front*  
746 *Endocrinol (Lausanne)* (2022) 13:856973. doi: 10.3389/fendo.2022.856973.
- 747 77. Kim TH, Lee Y, Lee YS, Gim JA, Ko E, Yim SY, et al. Circulating miRNA is a useful  
748 diagnostic biomarker for nonalcoholic steatohepatitis in nonalcoholic fatty liver disease. *Sci Rep*  
749 (2021) 11(1):14639. doi: 10.1038/s41598-021-94115-6.
- 750 78. Fu J, Wu B, Zhong S, Deng W, Lin F. miR-29a-3p suppresses hepatic fibrosis pathogenesis  
751 by modulating hepatic stellate cell proliferation via targeting PIK3R3 gene expression. *Biochem*  
752 *Biophys Res Commun* (2020) 529(4):922-9. doi: 10.1016/j.bbrc.2020.06.102.
- 753 79. McCurdy CE, Bishop JM, Williams SM, Grayson BE, Smith MS, Friedman JE, et al.  
754 Maternal high-fat diet triggers lipotoxicity in the fetal livers of nonhuman primates. *J Clin Invest*  
755 (2009) 119(2):323-35. doi: 10.1172/JCI32661.
- 756 80. Liang Q, Chen H, Xu X, Jiang W. miR-182-5p attenuates high-fat -diet-induced nonalcoholic  
757 steatohepatitis in mice. *Ann Hepatol* (2019) 18(1):116-25. doi: 10.5604/01.3001.0012.7902.
- 758 81. Carreras-Badosa G, Bonmatí A, Ortega FJ, Mercader JM, Guindo-Martínez M, Torrents D, et  
759 al. Dysregulation of placental miRNA in maternal obesity is associated with pre- and postnatal  
760 growth. *J Clin Endocrinol Metab* (2017) 102(7):2584-94. doi: 10.1210/jc.2017-00089.
- 761 82. Li M, Chen WD, Wang YD. The roles of the gut microbiota-miRNA interaction in the host  
762 pathophysiology. *Mol Med* (2020) 26(1):101. doi: 10.1186/s10020-020-00234-7.
- 763 83. Prince AL, Pace RM, Dean T, Takahashi D, Kievit P, Friedman JE, et al. The development  
764 and ecology of the Japanese macaque gut microbiome from weaning to early adolescence in  
765 association with diet. *Am J Primatol* (2019) 81(10-11):e22980. doi: 10.1002/ajp.22980.
- 766 84. Lopetuso LR, Scaldaferrri F, Petito V, Gasbarrini A. Commensal Clostridia: leading players in  
767 the maintenance of gut homeostasis. *Gut Pathog* (2013) 5(1):23. doi: 10.1186/1757-4749-5-23.
- 768 85. Kang TS, Korber DR, Tanaka T. Regulation of dual glycolytic pathways for fructose  
769 metabolism in heterofermentative *Lactobacillus panis* PM1. *Appl Environ Microbiol* (2013)  
770 79(24):7818-26. doi: 10.1128/aem.02377-13.
- 771 86. Ferrocino I, Ponzio V, Gambino R, Zarovska A, Leone F, Monzeglio C, et al. Changes in the  
772 gut microbiota composition during pregnancy in patients with gestational diabetes mellitus (GDM).  
773 *Sci Rep* (2018) 8(1):12216. doi: 10.1038/s41598-018-30735-9.
- 774 87. Crusell MKW, Hansen TH, Nielsen T, Allin KH, Rühlemann MC, Damm P, et al. Gestational  
775 diabetes is associated with change in the gut microbiota composition in third trimester of pregnancy  
776 and postpartum. *Microbiome* (2018) 6(1):89. doi: 10.1186/s40168-018-0472-x.
- 777 88. Taricco E, Radaelli T, Nobile de Santis MS, Cetin I. Foetal and placental weights in relation  
778 to maternal characteristics in gestational diabetes. *Placenta* (2003) 24(4):343-7. doi:  
779 10.1053/plac.2002.0913.
- 780 89. Morishita A, Oura K, Tadokoro T, Fujita K, Tani J, Masaki T. MicroRNA interference in  
781 hepatic host-pathogen interactions. *Int J Mol Sci* (2021) 22(7). doi: 10.3390/ijms22073554.

- 782 90. Hu Y, Peng X, Du G, Zhang Z, Zhai Y, Xiong X, et al. MicroRNA-122-5p inhibition  
783 improves inflammation and oxidative stress damage in dietary-induced non-alcoholic fatty liver  
784 disease through targeting FOXO3. *Front Physiol* (2022) 13:803445. doi: 10.3389/fphys.2022.803445.
- 785 91. Raitoharju E, Seppälä I, Lyytikäinen LP, Viikari J, Ala-Korpela M, Soininen P, et al. Blood  
786 hsa-miR-122-5p and hsa-miR-885-5p levels associate with fatty liver and related lipoprotein  
787 metabolism-The Young Finns Study. *Sci Rep* (2016) 6:38262. doi: 10.1038/srep38262.
- 788 92. Benítez-Páez A, Gómez Del Pugar EM, López-Almela I, Moya-Pérez Á, Codoñer-Franch P,  
789 Sanz Y. Depletion of *Blautia* species in the microbiota of obese children relates to intestinal  
790 inflammation and metabolic phenotype worsening. *mSystems* (2020) 5(2). doi:  
791 10.1128/mSystems.00857-19.
- 792 93. Ozato N, Yamaguchi T, Mori K, Katashima M, Kumagai M, Murashita K, et al. Two *Blautia*  
793 species associated with visceral fat accumulation: A one-year longitudinal study. *Biology (Basel)*  
794 (2022) 11(2). doi: 10.3390/biology11020318.
- 795 94. Yan H, Qin Q, Chen J, Yan S, Li T, Gao X, et al. Gut microbiome alterations in patients With  
796 visceral obesity based on quantitative computed tomography. *Front Cell Infect Microbiol* (2021)  
797 11:823262. doi: 10.3389/fcimb.2021.823262.
- 798 95. Short JD, Tavakoli S, Nguyen HN, Carrera A, Farnen C, Cox LA, et al. Dyslipidemic diet-  
799 induced monocyte "priming" and dysfunction in non-human primates is triggered by elevated plasma  
800 cholesterol and accompanied by altered histone acetylation. *Front Immunol* (2017) 8:958. doi:  
801 10.3389/fimmu.2017.00958.
- 802 96. Basu S, Haghiac M, Surace P, Challier JC, Guerre-Millo M, Singh K, et al. Pregravid obesity  
803 associates with increased maternal endotoxemia and metabolic inflammation. *Obesity (Silver Spring)*  
804 (2011) 19(3):476-82. doi: 10.1038/oby.2010.215.
- 805 97. Frias AE, Morgan TK, Evans AE, Rasanen J, Oh KY, Thornburg KL, et al. Maternal high-fat  
806 diet disturbs uteroplacental hemodynamics and increases the frequency of stillbirth in a nonhuman  
807 primate model of excess nutrition. *Endocrinology* (2011) 152(6):2456-64. doi: 10.1210/en.2010-  
808 1332.
- 809 98. Nash MJ, Dobrinskikh E, Newsom SA, Messaoudi I, Janssen RC, Aagaard KM, et al.  
810 Maternal Western diet exposure increases periportal fibrosis beginning in utero in nonhuman primate  
811 offspring. *JCI Insight* (2021) 6(24). doi: 10.1172/jci.insight.154093.
- 812 99. Thorn SR, Baquero KC, Newsom SA, El Kasmi KC, Bergman BC, Shulman GI, et al. Early  
813 life exposure to maternal insulin resistance has persistent effects on hepatic NAFLD in juvenile  
814 nonhuman primates. *Diabetes* (2014) 63(8):2702-13. doi: 10.2337/db14-0276.
- 815 100. Elsagr JM, Zhao SK, Ricciardi V, Dean TA, Takahashi DL, Sullivan E, et al. Western-style  
816 diet consumption impairs maternal insulin sensitivity and glucose metabolism during pregnancy in a  
817 Japanese macaque model. *Sci Rep* (2021) 11(1):12977. doi: 10.1038/s41598-021-92464-w.

818

819

## 820 **Figure Legends**

821 **Figure 1.** WD-fed dams exhibit alterations in inflammation and lipid metabolism at 0.6 gestation.  
822 Maternal body weight (**A**), sum of ( $\Sigma$ ) skin folds as a measure of adiposity (**B**). Maternal serum levels  
823 of C-reactive protein (CRP, **C**), neutrophil count from complete blood count (**D**), serum IL-6 levels  
824 (**E**), and triglycerides (**F**). Cholesterol analysis of red blood cells (**G**) and IVGTT analysis (**H**).  $n = 5$ -  
825 6 CD and  $n = 5$  WD. Unpaired 2-tailed Student's  $t$  test was used to test significance.  $*P < 0.05$ ,  $**P$   
826  $< 0.01$ .

827 **Figure 2.** WD exposure increases monocyte infiltration of the placenta and induces fetal hepatic  
828 steatosis and fibrosis. Representative images for immunofluorescence in placenta tissue and  
829 quantitation (**A**). Red arrows point to MAC387-labeled macrophages (green). Blue staining - DAPI.  
830 (**B**) mRNA expression of cytokines in placenta using qPCR. *ACTB* was used for reference.  
831 Representative images of histological analysis of fetal liver tissue (**C**) with H&E, picrosirius red  
832 (PSR), and LipidSpot, taken at 100  $\mu$ m. Fetal liver triglycerides (TG) (**D**) and mRNA expression  
833 analysis using qPCR (**D**) with *RPS9* used for normalization.  $n = 4$ -6 CD and  $n = 5$  WD. Unpaired 2-  
834 tailed Student's  $t$  test was used to test significance.  $^{\#}P < 0.1$ ,  $*P < 0.05$ ,  $****P < 0.0001$ .

835 **Figure 3.** Short-duration exposure to WD induces few alterations in maternal SCFAs and microbiota.  
836 (**A**) Abundance of fecal SCFAs.  $n = 5$ /group. Unpaired 2-tailed Student's  $t$  test was used to test  
837 significance.  $**P < 0.01$ . (**B**) Microbial abundances for each gut sample, clustered at the order level.  
838 Orders comprising less than 0.5% total abundance are displayed as "Other".

839 **Figure 4.** (**A**) Alpha diversity measured using Faith's phylogenetic diversity. Significance of species  
840 richness was tested using the Kruskal-Wallis test ( $P = 0.02$ ). (**B**) PCoA ordination displaying  
841 weighted Unifrac beta diversity. Percent variation explained is shown on each axis (PC1: 35% &  
842 PC2: 16%). PERMANOVA significance for the weighted Unifrac distances ( $P = 0.26$ ). (**C**) Lefse  
843 histograms plotted for significant enrichment in taxa abundances (upper plot) and biochemical  
844 pathways (lower plot).  $n = 5$ /group.

845 **Figure 5.** MicroRNA expression analysis. Expression of miRNAs in CD- and WD-exposed fetal  
846 liver (**A**) and placental tissue (**B**).  $n = 6$  CD and  $n = 5$  WD. Unpaired 2-tailed Student's  $t$  test was  
847 used to test significance.  $*P < 0.05$ ,  $**P < 0.01$ .

848

849 **Table 1.** Associations of maternal metabolic measurements compared to maternal microbiota and  
850 placental miRNA

|                             | Microbiota                             |       |         |        | Placenta        |                    |         |        |
|-----------------------------|----------------------------------------|-------|---------|--------|-----------------|--------------------|---------|--------|
|                             | Taxa (Genus or Family)                 | r2    | P value | FDR    | miRNA           | r2                 | P value | FDR    |
| <b>Dam metabolism</b>       |                                        |       |         |        |                 |                    |         |        |
| Body wt                     | <i>Clostridium</i>                     | +0.01 | 0.0374  | 0.5478 |                 |                    |         |        |
|                             | <i>Oscillospira</i>                    | +0.32 | 0.0498  | 0.5729 |                 |                    |         |        |
|                             | Unclassified<br><i>Lachnospiraceae</i> | +0.41 | 0.0040  | 0.1300 |                 |                    |         |        |
| SSF                         |                                        |       |         |        | miR-21-5p       | -0.34              | 0.0340  | 0.1831 |
| <b>Dam lipid metabolism</b> |                                        |       |         |        |                 |                    |         |        |
| TGs                         | Unclassified<br><i>Bacteroidales</i>   | +0.32 | 0.0029  | 0.1168 | miR-183-5p      | -0.50              | 0.0129  | 0.1405 |
|                             |                                        |       |         |        | miR-182-5p      | -0.57              | 0.0068  | 0.1368 |
| HDL                         | Unclassified<br><i>Rickettsiales</i>   | +0.43 | <0.0001 | 0.0037 | miR-204-5p:sex  | M: -0.56; F: 0.27  | 0.0355  | 0.1834 |
|                             | Unclassified<br><i>Verrucomicrobia</i> | +0.38 | 0.0014  | 0.0342 | miR-21-5p:sex   | M: -0.70; F: -0.34 | 0.0215  | 0.1565 |
|                             | Unclassified<br><i>Bacteroidales</i>   | +0.18 | 0.0021  | 0.1156 |                 |                    |         |        |
|                             | <i>Catenibacterium</i>                 | +0.29 | 0.0161  | 0.3247 |                 |                    |         |        |
|                             | <i>Succinivibrio</i>                   | +0.25 | 0.0070  | 0.1890 |                 |                    |         |        |
| LDL/VLDL                    | Unclassified<br><i>Ruminococcaceae</i> | +0.22 | 0.0496  | 0.5729 | miR-183-5p      | -0.55              | 0.0084  | 0.1368 |
|                             | Unclassified<br><i>Rickettsiales</i>   | +0.05 | 0.0242  | 0.4329 | miR-199a-5p:sex | M: -0.77; F: 0     | 0.0437  | 0.2007 |
|                             | <i>Treponema</i>                       | -0.07 | 0.0122  | 0.2813 |                 |                    |         |        |
| <b>Dam inflammation</b>     |                                        |       |         |        |                 |                    |         |        |
| CRP                         | <i>Paraprevotellaceae</i>              | +0.49 | 0.0035  | 0.0632 |                 |                    |         |        |
| <b>Placenta</b>             |                                        |       |         |        |                 |                    |         |        |
| Weight                      | <i>Desulfovibrionaceae</i>             | +0.32 | 0.0012  | 0.0342 |                 |                    |         |        |
|                             | <i>Methanobrevibacter</i>              | +0.11 | 0.0413  | 0.5547 |                 |                    |         |        |

851 Maternal measures were compared to maternal gut microbiota abundances using negative binomial  
852 models. Maternal measures were compared to placental miRNAs with ANOVA. Both comparisons  
853 utilized LASSO regularization for variable selection.  
854 CRP, C-reactive protein; HDL, high-density lipoprotein; LDL, low-density lipoprotein; SSF, sum of  
855 skin folds; TG, triglyceride; VLDL, very low-density lipoprotein; wt, weight.  
856

857 **Table 2.** Associations between maternal and placental characteristics and fetal liver measurements.

|                             | <b>Fetal liver</b> | <b>r2</b>          | <b>P value</b> | <b>FDR</b> |
|-----------------------------|--------------------|--------------------|----------------|------------|
| <b>Dam metabolism</b>       |                    |                    |                |            |
| Body wt                     | miR-1285-3p        | +0.43              | 0.0171         | 0.1467     |
|                             | <i>VEGFA</i>       | +0.43              | 0.0322         | 0.1816     |
|                             | <i>NFE2L2</i>      | -0.46              | 0.0136         | 0.1405     |
| SSF                         | <i>CYP1A1</i>      | -0.57              | 0.0074         | 0.1368     |
| <b>Dam lipid metabolism</b> |                    |                    |                |            |
| TGs                         | TGs                | +0.60              | 0.0088         | 0.1368     |
|                             | <i>ICAM1</i>       | -0.47              | 0.0254         | 0.1577     |
|                             | <i>NFE2L2</i>      | -0.39              | 0.0321         | 0.1816     |
|                             | <i>ACACA</i>       | -0.4               | 0.0403         | 0.1924     |
| HDL                         | TGs                | +0.45              | 0.0207         | 0.1565     |
|                             | miR-145-3p         | -0.62              | 0.0042         | 0.1368     |
| LDL/VLDL                    | TGs                | +0.87              | 0.0001         | 0.0197     |
|                             | miR204-5p          | -0.47              | 0.0177         | 0.1467     |
|                             | miR204-5p:sex      | M: -0.69; F: -0.12 | 0.0464         | 0.2054     |
| <b>Placenta</b>             |                    |                    |                |            |
| Weight                      | miR-34a-5p         | +0.64              | 0.0061         | 0.1368     |
|                             | <i>TREM2</i>       | +0.53              | 0.0245         | 0.1577     |
|                             | <i>TLR4</i>        | +0.53              | 0.0254         | 0.1577     |

858 Maternal measures were compared to fetal liver miRNA and mRNA expression using ANOVA with  
 859 LASSO regularization for variable selection.

860 HDL, high-density lipoprotein; LDL, low-density lipoprotein; SSF, sum of skin folds; TG,  
 861 triglyceride; VLDL, very low-density lipoprotein; wt, weight.

862



863 **Table 3.** Fetal liver triglyceride associations with miRNAs and mRNAs.

|                   | <b>r2</b>         | <b>P value</b> | <b>FDR</b> |
|-------------------|-------------------|----------------|------------|
| Fetal liver miRNA |                   |                |            |
| miR-204-5p        | +0.38             | 0.0341         | 0.1627     |
| miR-145-3p        | +0.54             | 0.0140         | 0.1627     |
| Fetal liver mRNA  |                   |                |            |
| <i>COL1A1</i>     | -0.68             | 0.0139         | 0.5819     |
| <i>CCR2</i>       | +0.51             | 0.0434         | 0.6427     |
| <i>IL6</i> :sex   | M: -0.91, F: 0.78 | 0.0233         | 0.5819     |
| Placental miRNA   |                   |                |            |
| miR-182-5p        | +0.47             | 0.0168         | 0.1627     |
| miR-34a-5p        | +0.39             | 0.0314         | 0.1627     |
| miR-199a-5p:sex   | M: -0.94, F: 0.29 | 0.0097         | 0.1627     |
| miR-199a-5p:sex   | M: -0.83, F: 0    | 0.0277         | 0.1627     |

864 Fetal liver triglycerides were compared to fetal liver miRNA/mRNA expression and placental  
865 miRNA expression with ANOVA models using LASSO regularization for variable selection.

866

867 **Table 4.** Associations between miRNAs and fetal liver mRNA expression levels.

| Pathway/mRNA                           | Fetal liver miRNA  | Placental miRNA    | r2    | P value | FDR           |
|----------------------------------------|--------------------|--------------------|-------|---------|---------------|
| Lipid metabolism/synthesis             |                    |                    |       |         |               |
| <i>ACACA</i>                           | -                  | miR-183-5p         | +0.59 | 0.0096  | 0.0564        |
| <i>ACACA</i>                           | -                  | miR-182-5p         | +0.44 | 0.0305  | 0.0983        |
| <i>FASN</i>                            | -                  | miR-185-5p         | +0.39 | 0.0414  | 0.1132        |
| <i>FASN</i>                            | -                  | miR-145-3p         | -0.54 | 0.0151  | 0.0624        |
| <i>HMOX1</i>                           | -                  | miR-183-5p         | +0.70 | 0.0036  | 0.0520        |
| <i>SREBP1</i>                          | -                  | miR-185-5p         | +0.40 | 0.0394  | 0.1132        |
| Oxidative stress                       |                    |                    |       |         |               |
| <i>NFE2L2</i>                          | <b>miR-1285-3p</b> | -                  | -0.50 | 0.0091  | 0.0564        |
| <i>NFE2L2</i>                          | -                  | <b>miR-1285-3p</b> | +0.48 | 0.0107  | 0.0564        |
| Inflammation                           |                    |                    |       |         |               |
| <i>ICAM1</i>                           | <b>miR-1285-3p</b> | -                  | -0.63 | 0.0063  | <b>0.0564</b> |
| <i>IL10</i>                            | -                  | miR-183-5p         | +0.45 | 0.0288  | 0.0983        |
| <i>IL10</i>                            | <b>miR-29a-3p</b>  | -                  | -0.58 | 0.0104  | <b>0.0564</b> |
| <i>IL10</i>                            | miR-34a-5p         | -                  | -0.39 | 0.0420  | 0.1132        |
| <i>IL6</i>                             | <b>miR-1285-3p</b> | -                  | +0.76 | 0.0006  | <b>0.0334</b> |
| <i>NCF4</i>                            | -                  | miR-182-5p         | +0.48 | 0.0228  | 0.0827        |
| <i>VCAM1</i>                           | <b>miR-1285-3p</b> | -                  | -0.63 | 0.0063  | 0.0564        |
| <i>VEGFA</i>                           | -                  | miR-185-5p         | +0.59 | 0.0093  | 0.0564        |
| <i>VEGFA</i>                           | -                  | miR-29a-3p         | -0.37 | 0.0483  | 0.1167        |
| Stellate cells activation and fibrosis |                    |                    |       |         |               |
| <i>COL1A1</i>                          | miR-204-5p         | -                  | +0.61 | 0.0132  | 0.0624        |
| <i>TGFB1</i>                           | -                  | miR-183-5p         | +0.69 | 0.0036  | 0.0520        |
| <i>TGFB1</i>                           | -                  | miR-182-5p         | +0.54 | 0.0149  | 0.0624        |
| <i>FAP</i>                             | -                  | miR-1285-3p        | -0.49 | 0.0211  | 0.0814        |
| <i>TNFSF12</i>                         | mir-183-5p         | -                  | +0.38 | 0.0461  | 0.1163        |

868 Fetal liver mRNA expression was compared to placental and liver miRNA expression using ANOVA  
 869 models with LASSO regularization for variable selection.

870

**Table 5.** Associations between maternal microbiota, fetal liver and placental miRNA, and fetal liver mRNA expression levels.

| Microbiota                 | Liver miRNA | Placental miRNA | Liver mRNA   | r2             | P value | FDR    |
|----------------------------|-------------|-----------------|--------------|----------------|---------|--------|
| Family                     |             |                 |              |                |         |        |
| <i>Succinivibrionaceae</i> | miR-122-5p  |                 |              | +0.41          | 0.0384  | 0.0922 |
| <i>Coriobacteriaceae</i>   |             | miR-1285-3p     |              | +0.53          | 0.0105  | 0.0387 |
| <i>Coriobacteriaceae</i>   |             | miR-1285-3p:sex |              | M: +0.57, F: 0 | 0.0129  | 0.0387 |
| <i>Prevotellaceae</i>      |             | miR-1285-3p     |              | +0.55          | 0.0088  | 0.0387 |
| <i>Prevotellaceae</i>      |             | miR-1285-3p:sex |              | M: +0.70, F: 0 | 0.0083  | 0.0387 |
| <i>Clostridiaceae</i>      |             |                 | <i>IL1B</i>  | -0.39          | 0.0326  | 0.0718 |
| <i>Lachnospiraceae</i>     |             |                 | <i>IL1B</i>  | +0.47          | 0.0175  | 0.0641 |
| <i>Lachnospiraceae</i>     |             |                 | <i>ACTA2</i> | +0.40          | 0.0297  | 0.0718 |
| Genus                      |             |                 |              |                |         |        |
| <i>Blautia</i>             | miR-122-5p  |                 |              | -0.77          | 0.0011  | 0.0032 |
| <i>Ruminococcus</i>        | miR-122-5p  |                 |              | +0.49          | 0.0214  | 0.0321 |

871 Maternal gut microbiota abundances were compared to fetal liver miRNA/mRNA expression and  
872 placental miRNA expression using negative binomial regression models with LASSO regularization  
873 for variable selection.

874

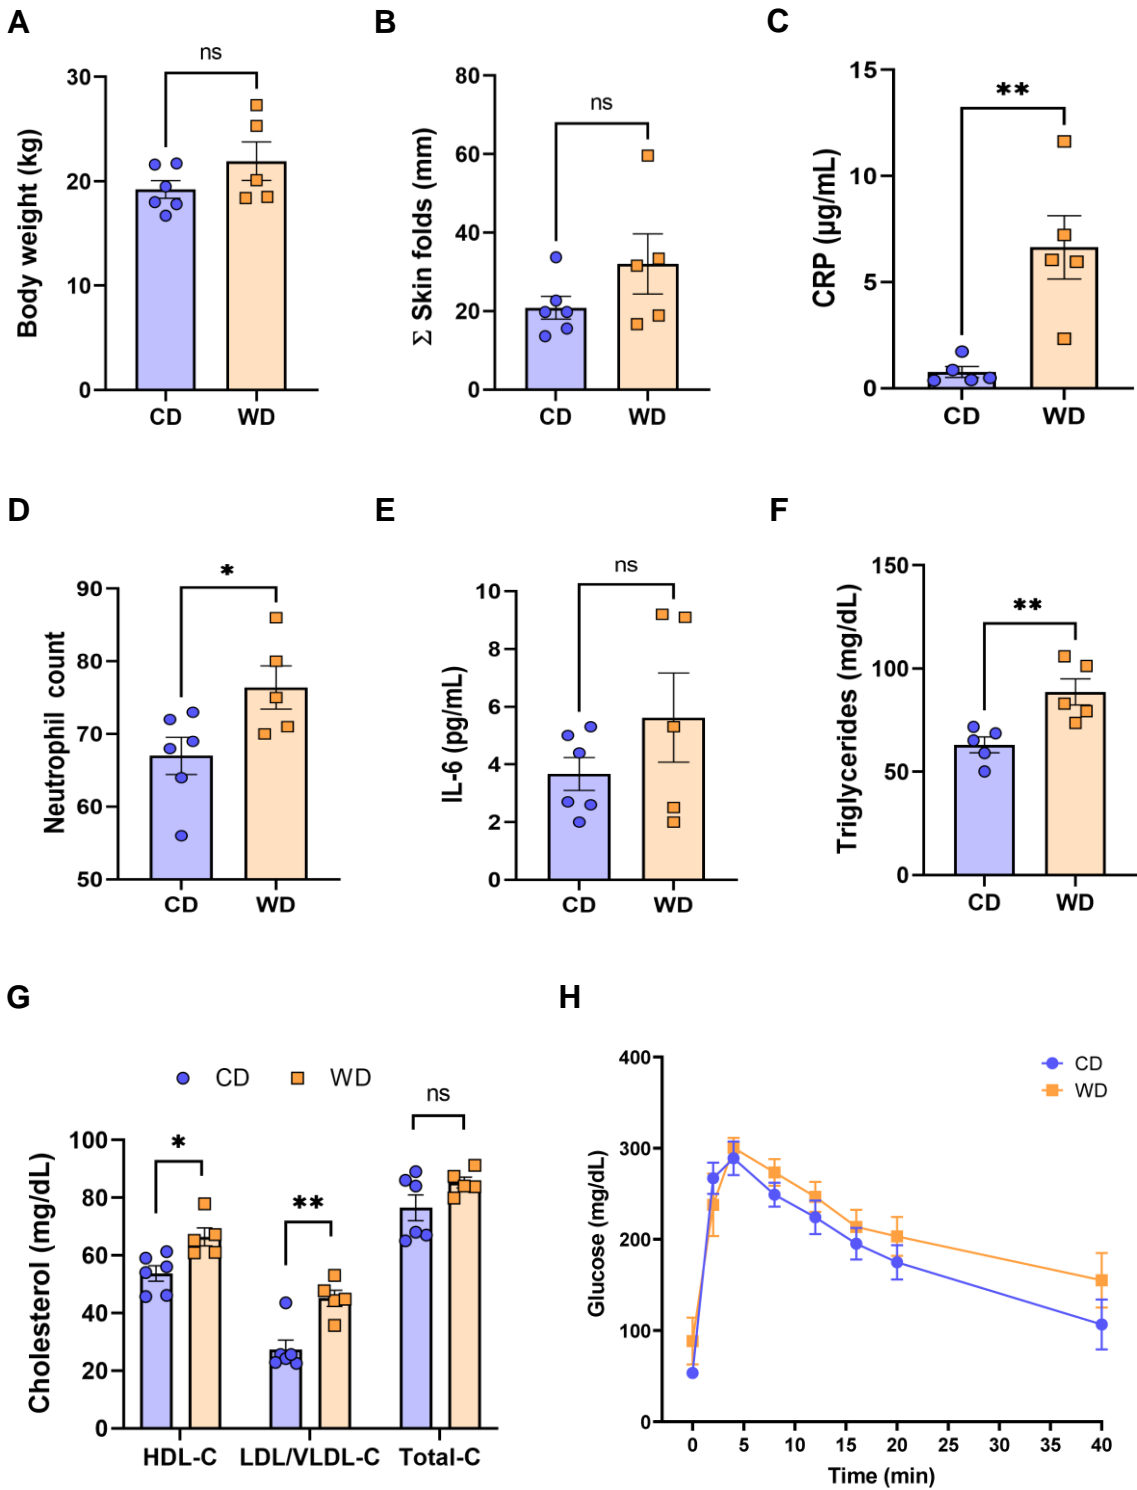

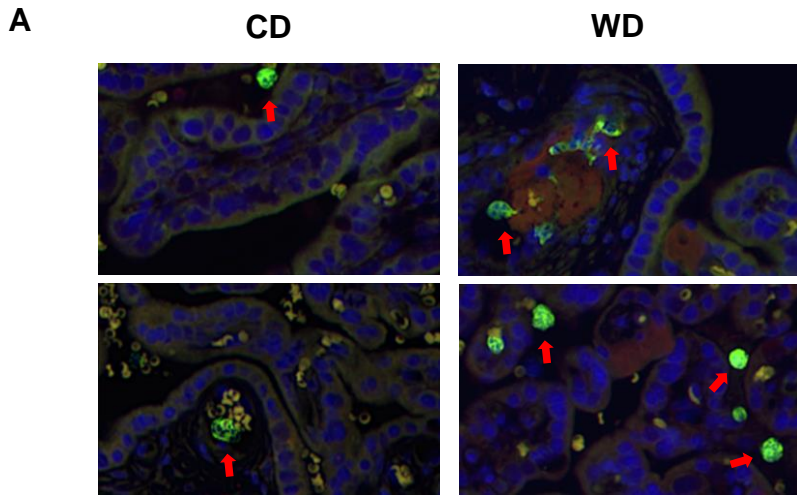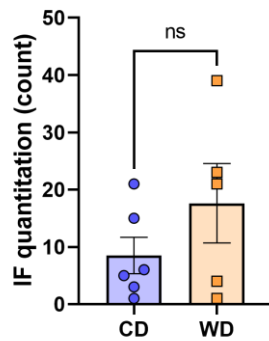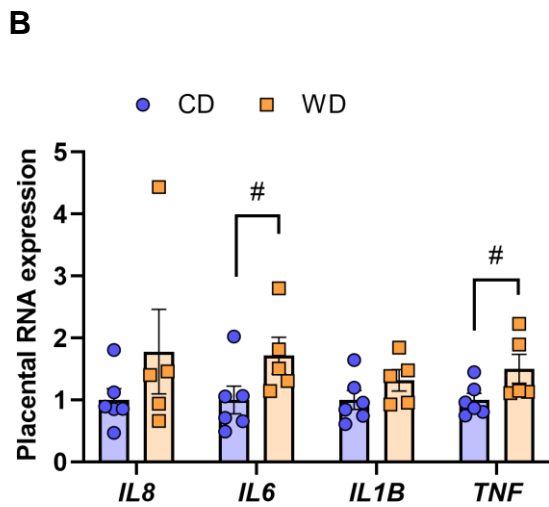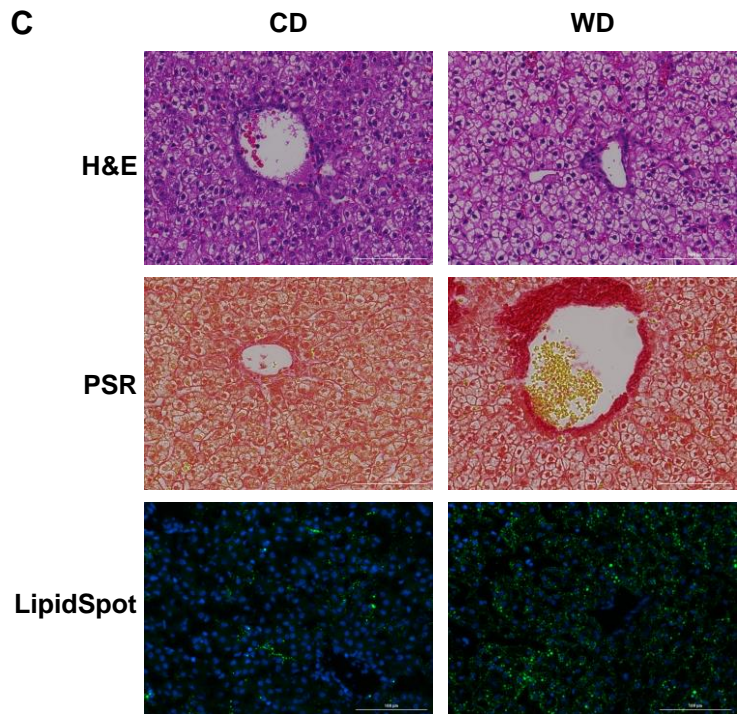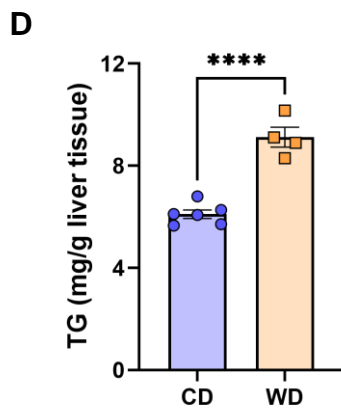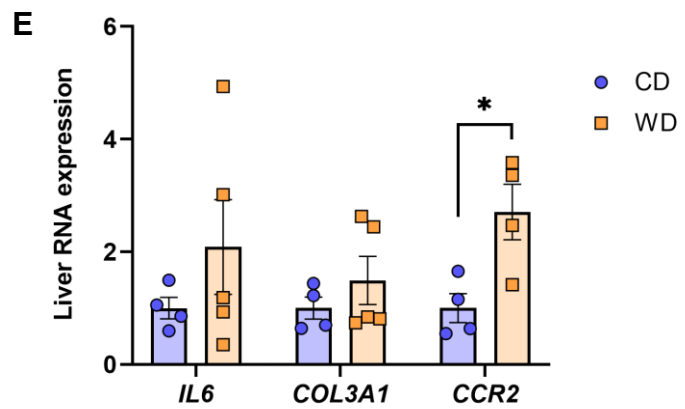

**A**

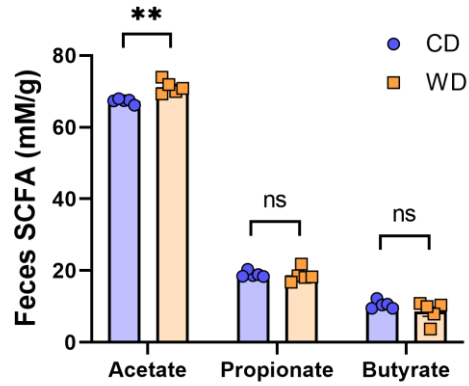

**B**

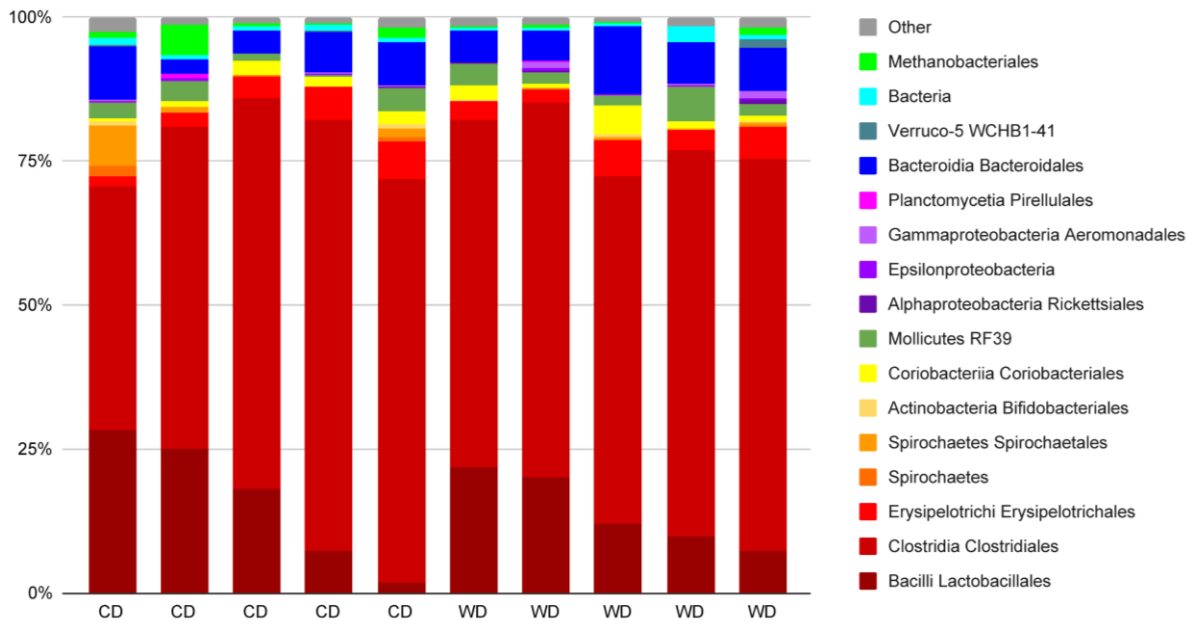

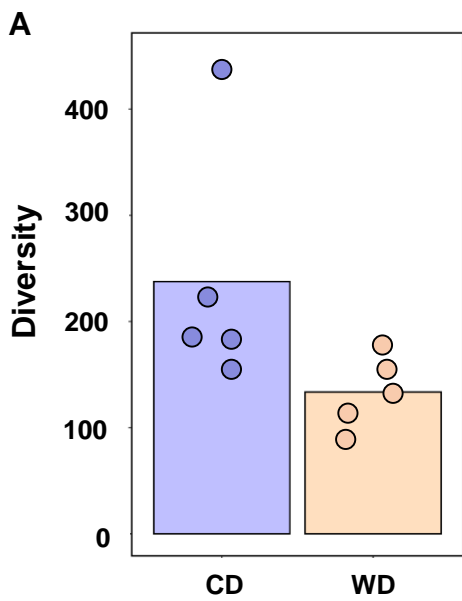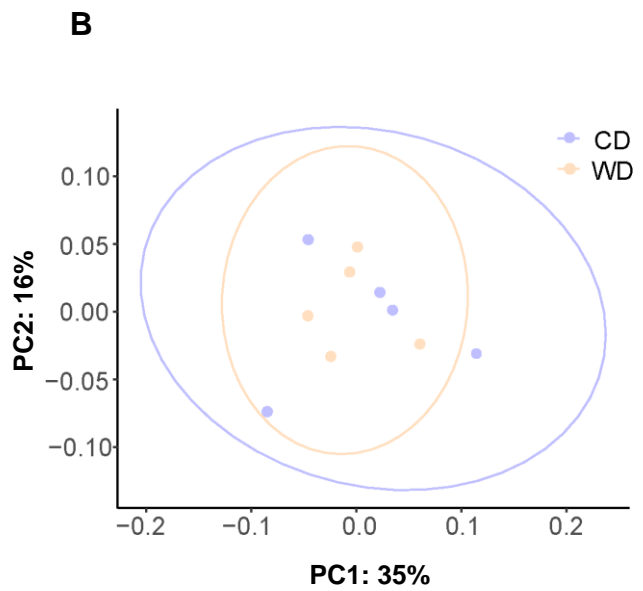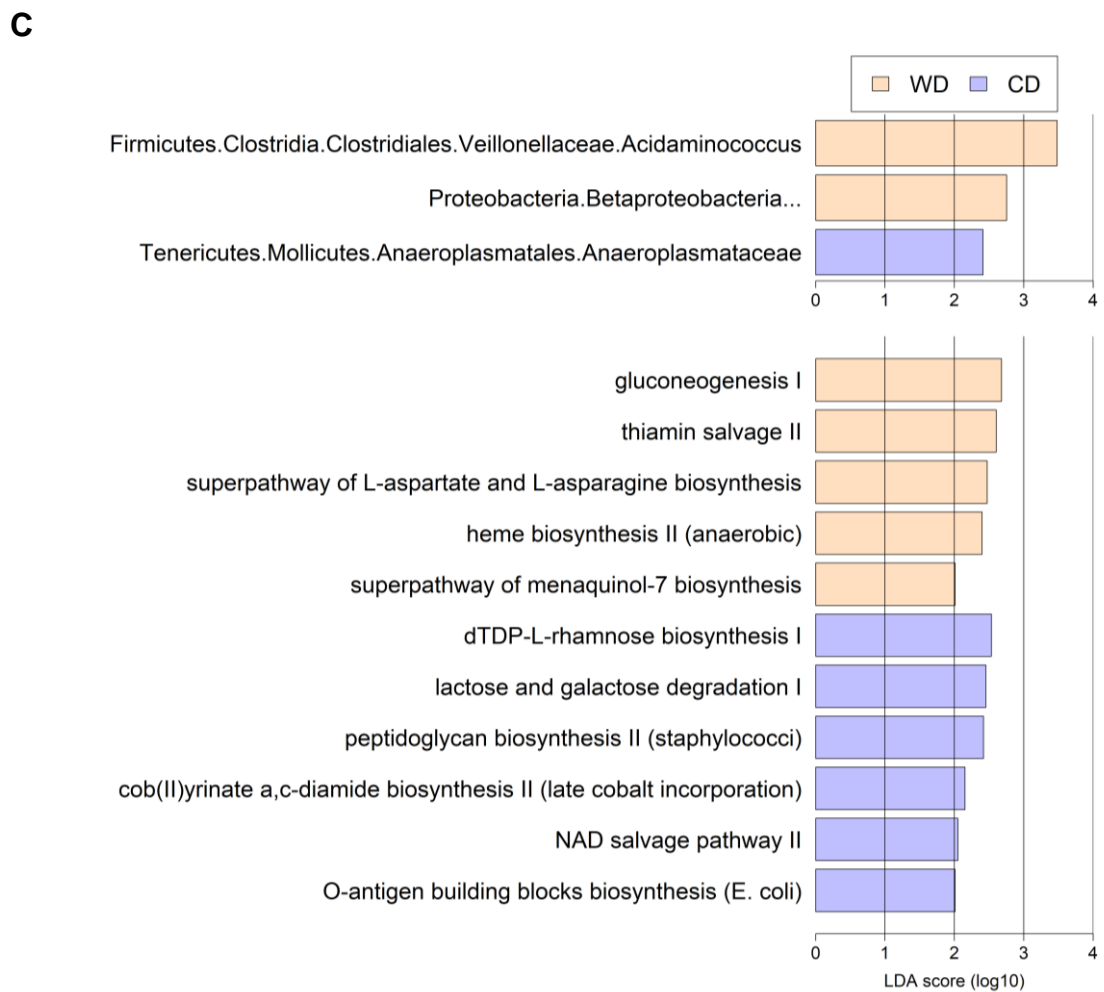

**A**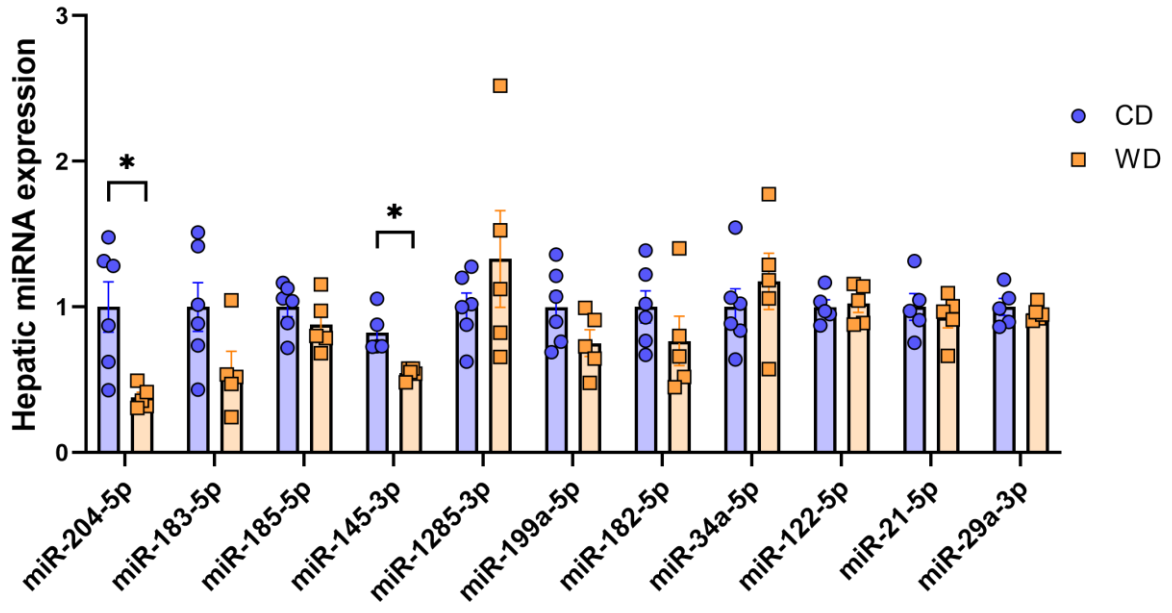**B**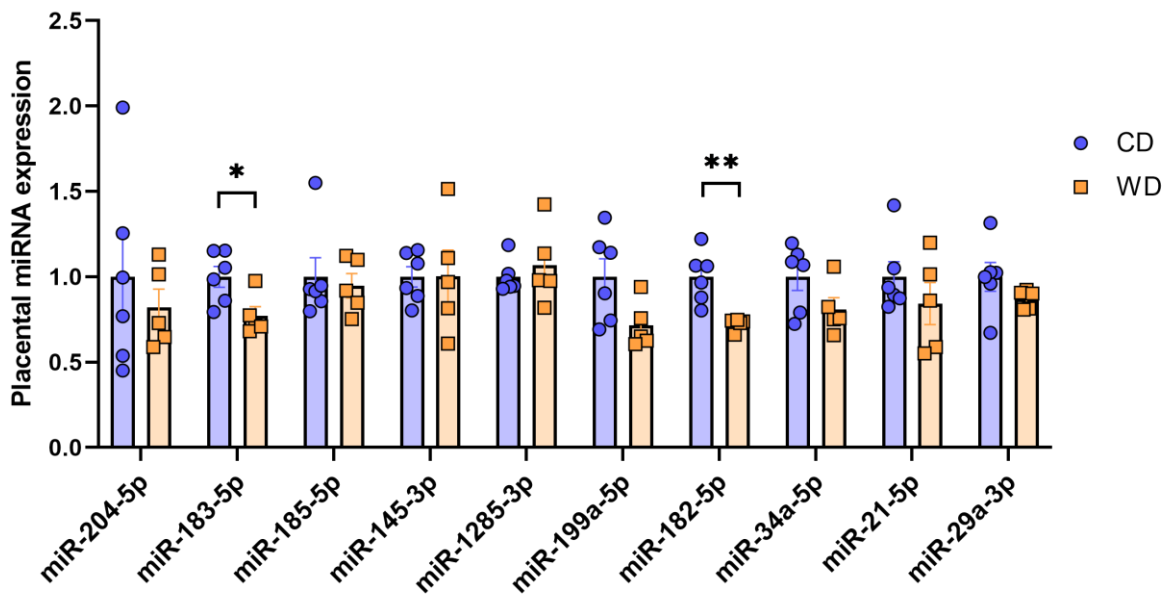

Source: https://www.biorxiv.org/content/10.1101/2022.05.18.492490v1.full.pdf
